# Origin of the mobile di-hydro-pterolate synthase gene determining sulfonamide resistance in clinical isolates

1 Miquel Sánchez-Osuna<sup>1</sup>, Pilar Cortés<sup>1</sup>, Jordi Barbé<sup>1\*</sup>, Ivan Erill<sup>2\*</sup>

2 <sup>1</sup> Departament de Genètica i Microbiologia, Universitat Autònoma de Barcelona, Bellaterra, Spain

3 <sup>2</sup> Department of Biological Sciences, University of Maryland Baltimore County, Baltimore, MD,  
4 USA

5  
6 \* Corresponding Authors

7 E-mail: [jordi.barbe@uab.cat](mailto:jordi.barbe@uab.cat)

8 E-mail: [erill@umbc.edu](mailto:erill@umbc.edu)

9

10 **Keywords:** sulfonamide, resistance, antibiotic, phylogeny, mobile element, integron, plasmid.

## 11 Abstract

12 Sulfonamides are synthetic chemotherapeutic agents that work as competitive inhibitors of the di-  
13 hydro-pterolate synthase (DHPS) enzyme, encoded by the *folP* gene. Resistance to sulfonamides is  
14 widespread in the clinical setting and predominantly mediated by plasmid- and integron-borne *sul1-3*  
15 genes encoding mutant DHPS enzymes that do not bind sulfonamides. In spite of their clinical  
16 importance, the genetic origin of *sul1-3* genes remains unknown. Here we analyze *sul* genes and their  
17 genetic neighborhoods to uncover *sul* signature elements that enable the elucidation of their genetic  
18 origin. We identify a protein sequence Sul motif associated with *sul*-encoded proteins, as well as  
19 consistent association of a phosphoglucosamine mutase gene (*glmM*) with the *sul2* gene. We identify  
20 chromosomal *folP* genes bearing these genetic markers in two bacterial families: the *Rhodobiaceae*  
21 and the *Leptospiraceae*. Bayesian phylogenetic inference of FolP/Sul and GlmM protein sequences  
22 clearly establishes that *sul1-2* and *sul3* genes originated as a mobilization of *folP* genes present in,  
23 respectively, the *Rhodobiaceae* and the *Leptospiraceae*, and indicate that the *Rhodobiaceae folP* gene  
24 was transferred from the *Leptospiraceae*. Analysis of %GC content in *folP/sul* gene sequences  
25 supports the phylogenetic inference results and indicates that the emergence of the Sul motif in  
26 chromosomally-encoded FolP proteins is ancient and considerably predates the clinical introduction  
27 of sulfonamides. *In vitro* assays reveal that both the *Rhodobiaceae* and the *Leptospiraceae*, but not  
28 other related chromosomally-encoded FolP proteins confer resistance in a sulfonamide-sensitive  
29 *Escherichia coli* background, indicating that the Sul motif is associated with sulfonamide resistance.  
30 Given the absence of any known natural sulfonamides targeting DHPS, these results provide a novel  
31 perspective on the emergence of resistance to synthetic chemotherapeutic agents, whereby  
32 preexisting resistant variants in the vast bacterial pangenome may be rapidly selected for and  
33 mobilized upon the clinical introduction of novel chemotherapeutics.

34

35

36 **1 Introduction**

37 Antibiotic resistance is a pressing problem in modern healthcare [1,2]. Bacterial cells present several  
38 mechanisms to cope with exposure to antibiotics or chemotherapeutic agents, which may be acquired  
39 through mutation or, most frequently, via lateral gene transfer on mobile genetic elements [3]. These  
40 mechanisms include modification of the antimicrobial target, degradation or chemical modification  
41 of the antimicrobial molecule, targeted reduction of antimicrobial uptake, active export of the  
42 antimicrobial through efflux pumps and use of alternate pathways and enzymes [3].

43 It is widely accepted that many antibiotic resistance genes present today in pathogenic bacteria  
44 originated from homologs evolved over eons in either the microbes that naturally produce the  
45 antibiotics or their natural competitors [4]. When coupled with the high plasticity of bacterial  
46 genomes and their co-existence with a large variety of genetic mobile elements, the availability of a  
47 readily evolved pool of antibiotic resistance genes set the stage for the rapid proliferation of multi-  
48 resistant strains in the clinical setting shortly after the commercial introduction of antibiotics [4]. In  
49 contrast, the origins of resistance against chemotherapeutic agents are harder to pinpoint. Since these  
50 were designed *in vitro*, it seems unlikely that a large pool of genes conferring resistance to  
51 chemotherapeutic agents existed before their introduction. After their discovery in the 1960's,  
52 resistance to quinolones was initially rare and limited to chromosomal mutations in DNA gyrase,  
53 topoisomerase IV or efflux pumps [5]. However, in the early 2000's plasmid-borne *qnr* genes were  
54 first detected and spread rapidly to clinical pathogens. Qnr is a member of the pentapeptide repeat  
55 family and was shown to confer resistance by binding to DNA gyrase and limiting the effect of  
56 quinolone drugs. The origin of plasmid-borne *qnr* genes has been traced to environmental homologs  
57 and these are thought to have derived from genes originally targeting antibiotics, such as microcin  
58 B17 [6].

59 Aryl sulfonamides are synthetic antibacterial compounds presenting a similar structure to para-amino  
60 benzoic acid (PABA), and containing a sulfonamide group linked to an aromatic group. Commonly  
61 referred to as sulfonamides or sulfa drugs due to their clinical relevance, synthetic aryl sulfonamides  
62 function as competitive inhibitors of the di-hydro-pterolate synthase (DHPS) enzyme, encoded in  
63 bacteria by the *folP* gene [7]. DHPS participates in folate synthesis using PABA as a substrate, and  
64 the competitive inhibition of DHPS by sulfonamides results in growth arrest [7,8]. Experiments in  
65 mice in the 1930's demonstrated the effectiveness of sulfonamide against bacteria, and sulfonamide  
66 became the first antibacterial chemotherapeutic to be used systemically [9,10]. It remained in use  
67 throughout World War II, but by the end of the 1940's resistant strains started to emerge and  
68 sulfonamides were rapidly displaced in favor of the newly discovered antibiotics [7,11].

69 Resistance to sulfonamide through increased production of PABA was reported in the early 1940's  
70 [12], but the most commonly reported mechanism of sulfonamide resistance are mutations to the  
71 chromosomal *folP* gene [7,13]. Mutations to the chromosomal *folP* gene have been shown to provide  
72 varying degrees of trade-off between resistance and efficient folate synthesis, decreasing DHPS  
73 affinity for sulfonamide while maintaining or increasing its affinity for PABA [7]. These mutations  
74 have occurred independently in multiple bacterial genera and target multiple conserved areas of the  
75 DHPS protein [7]. However, similar mutational profiles, such as two-amino acid insertions in  
76 *Neisseria meningitidis* and *Streptococcus pneumoniae*, have been reported [14,15], and in both these  
77 genera there is evidence of extensive recombination within *folP* genes [16,17].

78 In spite of the multiple instances of chromosomal *folP* resistant variants, clinical resistance to  
79 sulfonamides is predominantly plasmid-borne and mediated by *sul* genes encoding alternative  
80 sulfonamide-resistant DHPS enzymes [7]. Four different *sul* genes have been described to date, with  
81 *sul1* and *sul2* being the predominant forms in clinical isolates [18]. The *sul1* gene is typically found

82 in class 1 integrons and linked to other resistance genes [18], whereas *sul2* is usually associated to  
83 non-conjugative plasmids of the IncQ group [19] and to large transmissible plasmids like pBP1 [20].  
84 The *sul3* gene was characterized in the *Escherichia coli* conjugative plasmid pVP440. It was shown  
85 to be flanked by two copies of the insertion element IS15 $\Delta$ /26 and to be widespread in *E. coli* isolates  
86 from pigs in Switzerland [21]. Recently, a *sul4* gene was identified in a systematic prospection of  
87 class 1 integron-borne genes in Indian river sediments, but this *sul* variant has not yet been detected  
88 in clinical isolates. Genomic context analyses revealed that the *sul4* gene had been recently mobilized  
89 and phylogenetic inference pinpointed its putative origin as part of the folate synthesis cluster in the  
90 Chloroflexi phylum [22].

91 Despite the importance of sulfonamides in human and animal therapy, the putative origin of the three  
92 *sul* genes that account for the vast majority of reported clinical resistance to sulfonamide remains to  
93 be elucidated. In this work we leverage comparative genomics, phylogenetic analysis and *in vitro*  
94 determination of minimal inhibitory concentrations (MIC) of sulfamethoxazole to unravel the origin  
95 of the *sul1*, *sul2* and *sul3* genes. Our analysis indicates that chromosomally-encoded *folP* genes  
96 conferring resistance to sulfonamide originated in members of the *Leptospiraceae* family and were  
97 transferred to the Alphaproteobacteria *Rhodobiaceae* family more than 500 million years ago. These  
98 isolated sources of chromosomally-encoded sulfonamide-resistant DHPS were mobilized  
99 independently following the commercial introduction of sulfonamides, leading to the broadly  
100 disseminated *sul1*, *sul2* and *sul3* resistance genes. Our results hence indicate that resistance to  
101 synthetic chemotherapeutic agents may be available in the form of chromosomally-encoded variants  
102 among the extremely diverse bacterial domain, and can be rapidly disseminated upon the release of  
103 novel synthetic drugs.

## 104 **2 Materials and methods**

### 105 **2.1 Data collection**

106 FolP, GlmM and Sul1-3 homologs were identified in complete GenBank sequences through  
107 BLASTP [23] using the *E. coli* FolP (WP\_000764731) and GlmM (WP\_000071134) proteins as the  
108 query. Putative homologs were detected as BLASTP hits passing stringent e-value ( $<1e-20$ ) and  
109 query coverage (75%) thresholds. FolP and GlmM chromosomally-encoded proteins were identified  
110 on a representative genome of all bacterial orders with complete genome assemblies on RefSeq, of  
111 each bacterial family for the Proteobacteria, of any bacterial species where chromosomally-encoded  
112 sulfonamide resistance mutants had been reported, and on all available complete genomes for clades  
113 of interest (*Rhodobiaceae*, Spirochaetes and Chlamydiae) (Supplementary material 1). All protein  
114 coding gene sequences for these genomes were downloaded for %GC analysis. Sul proteins encoded  
115 by mobile *sul* genes were identified on complete plasmid, transposon and integron GenBank  
116 sequences.

### 117 **2.2 Identification and visualization of Sul-like signatures in FolP sequences**

118 To identify sequence motifs associated with Sul proteins, we performed a CLUSTALW alignment  
119 using a non-redundant ( $<99\%$  identity) subset of the Sul1-3 homologous sequences detected  
120 previously and FolP sequence sampled from each bacterial clade. Following visual inspection of the  
121 resulting alignment, a Sul-like motif conserved in several chromosomally-encoded FolP proteins was  
122 visualized using iceLogo [24] and a consensus motif was derived and encoded into a PROSITE-  
123 format pattern. The inferred PROSITE pattern was used to seed a Pattern Hit Initiated BLAST search  
124 against the NCBI non-redundant Protein database using as a query the protein sequences of Sul1-3  
125 reported in the literature (WP\_001336346, WP\_010890159, WP\_000034420) and conservative e-

126 value ( $<1e-20$ ) and query coverage (75%) limits. Only chromosomal hits with the identified signature  
127 characteristic of *sul* gene products were retained for further analysis.

### 128 **2.3 Multiple sequence alignment and phylogenetic inference**

129 For phylogenetic inference, multiple sequence alignments of identified *FolP/Sul1-3* and *GlmM*  
130 homologous sequences were performed with CLUSTALW [25] using variable (5, 10 and 25) gap  
131 opening penalties. These alignments were then integrated with local LALIGN alignments with T-  
132 COFFEE [26], and the resulting alignment was trimmed using the “less stringent selection”  
133 parameters of the Gblocks online service [27,28]. Bayesian phylogenetic inference on trimmed  
134 alignments was performed with MrBayes [29]. Four Metropolis-Coupled Markov Chain Monte Carlo  
135 runs with four independent chains were carried out for 30,000,000 generations, and the resulting  
136 consensus tree was plotted with FigTree.

### 137 **2.4 DNA sequence analyses**

138 Analysis of %GC in synonymous and non-synonymous patterns and  $K_a/K_s$  divergence were  
139 performed according to the Nei-Gojobori computation method [30] and the standalone PAL2NAL  
140 program for codon-based alignments [31], using custom Python scripts for pipelining. Analyses of  
141 %GC content were performed on all sampled bacterial genomes, computing genome-wide %GC  
142 statistics and comparing them to *folP* estimates. Analyses of  $K_a/K_s$  divergence were performed on  
143 pair-wise alignments of the N- and C-terminal ends of the *glmM* gene sequence of all sampled  
144 bacterial groups. One-sided Mann-Whitney U-tests were performed using GraphPad Prism to  
145 determine whether differences between *folP* and chromosomal %GC content were different in the  
146 presence and absence of Sul-like signature motifs, and whether the N- and C-terminal regions  
147 presented different mutational profiles. The scripts used for the analysis are available at the GitHub  
148 ErillLab repository. Amelioration times were estimated using the Ameliorator program [32] under  
149 different selection modes.  $K_a$  and  $K_s$  values were estimated from pairwise alignments of orthologs  
150 between the *Parvibaculum lavamentivorans* and *Leptospira interrogans* genomes as determined by  
151 the OMA Orthology database [33] and species divergence times were inferred from published  
152 molecular clock phylogenies [34].

### 153 **2.5 Cloning, transformation and complementation of the *folP* gene for broth microdilution** 154 **assays**

155 The *L. interrogans* serovar Lai str. 56601 *folP* and *Chlamydia trachomatis* D/UW-3/CX *folKP* gene  
156 were synthesized and adapted to *E. coli* codon usage at ATG:biosynthetics GmbH, Germany;  
157 whereas *P. lavamentivorans* DS-1 (DSMZ 13023) and *Rhodobacter sphaeroides* 2.4.1 (gently  
158 provided by Professor S. Kaplan; Health Science Center, University of Texas) *folP* genes were  
159 amplified from genomic DNA. The *sul2* gene was amplified from the RSF1010 plasmid (Josep  
160 Antón, Instituto de Biotecnología y Biomedicina) [35,36] and used as a positive control. The *folP/sul*  
161 genes were subcloned into the expression vector pUA1108 using NdeI and BamHI (Supplementary  
162 material 2), as previously described [37] and the recombinant plasmids were then transformed into  
163 competent *E. coli* K-12 (CGSC 5073). Antimicrobial susceptibility testing of sulfamethoxazole  
164 (Sigma-Aldrich) for the strains containing the *folP/sul* genes was determined as described using broth  
165 microdilution tests in Mueller-Hinton broth (MH) with half serial dilutions of sulfamethoxazole  
166 ranging from 512 to 0.125 mg/L [38].

167

## 168 3 Results

### 169 3.1 Identification of putative chromosomal origins for *sul1-3* genes

170 To identify putative chromosomal homologs of *sul1-3* genes, we performed a multiple sequence  
171 alignment including any protein sequences with at most 99% similarity to those encoded by *sul1-3*  
172 genes reported in the literature and by chromosomal *folP* genes from a representative of each  
173 bacterial order. Inspection of the resulting alignment (Figure 1A; Supplementary material 3) revealed  
174 the presence of a two-amino acid insertion in proteins encoded by *sul1-3* genes that is not present in  
175 those encoded by *sul4* or the analyzed chromosomal *folP* genes. This two-amino acid insertion is  
176 located in a conserved region of the FolP protein (residues R171-N211 of the *E. coli* FolP protein  
177 [WP\_000764731]) that presents other signature changes in *sul*-encoded proteins with respect to  
178 chromosomally-encoded FolP proteins (Figure 1AB; Supplementary material 3) [39,40]. We derived a  
179 PROSITE-format pattern (Supplementary material 4) of the identified Sul motif to seed a Pattern Hit  
180 Initiated BLAST search against the NCBI non-redundant (NR) protein database. This search  
181 identified several proteins encoded by *Rhodobiaceae* family members that presented a similar  
182 insertion pattern. BLASTP searches with these *Rhodobiaceae* FolP sequences matched proteins in  
183 several members of the *Leptospiraceae* and the Chlamydiae. However, analysis of the resulting  
184 multiple sequence alignment showed that only the *Leptospiraceae* FolP protein sequences displayed  
185 the identified two-amino acid insertion pattern (Supplementary material 5). Heretofore, we refer to  
186 these chromosomally-encoded FolP proteins containing the signature Sul motif as FolP\*, and to their  
187 encoding gene as *folP\**.

188 In order to gain further insight into the possible chromosomal origins of *sul* genes, we performed  
189 tBLASTX searches against the NCBI RefSeq Genome Database using the genetic surroundings  
190 (5,000 bp) of *sul1*, *sul2* and *sul3* genes with at most 90% similarity to those reported in the literature  
191 (Supplementary material 6). This search did not return consistent results for the *sul1* and *sul3* genetic  
192 surroundings, but it identified a conserved gene fragment encoding the N-terminal region of the  
193 phosphoglucosamine mutase GlmM protein downstream of *sul2* in multiple plasmids harboring this  
194 resistance gene. These *sul2*-associated GlmM sequences lack the entire GlmM C-terminal region,  
195 including three of its functional domains [41], and it can therefore be safely assumed that they are not  
196 functional as phosphoglucosamine mutases. This genetic arrangement has been reported previously  
197 as a feature of *sul2* isolates [42,43], and it is strongly conserved in the genomic surroundings of  
198 chromosomal *folP* genes in the Gammaproteobacteria, the Betaproteobacteria and several  
199 Alphaproteobacteria lineages (Figure 1C). Analysis of the *folP* genetic surroundings in complete  
200 genomes of the Spirochaetes and the Alphaproteobacteria shows clear differences between the genes  
201 coding for the identified *Rhodobiaceae* and *Leptospiraceae* FolP\* proteins harboring the two-amino  
202 acid insertion pattern and those without it (Figure 1C). The *Leptospiraceae* show a conserved  
203 arrangement with *folP\** flanked by a peptidoglycan-associated lipoprotein and a tetratricopeptide  
204 repeat-containing domain protein, whereas in most other Spirochaetes *folP* is flanked by a 1-deoxy-  
205 D-xylulose-5-phosphate synthase and a diadenylate cyclase. In contrast, the Alphaproteobacteria  
206 yield several distinct syntenic regions for *folP*. In the *Rhodobiaceae*, *folP\** is flanked by genes coding  
207 for either a FtsH-family metallopeptidase or a TetR-family transcriptional repressor and the  
208 phosphoglucosamine mutase *glmM*. In the Rhodobacterales, *folP* is flanked by a dihydroneopterin  
209 aldolase and *glmM*, but in the *Rhizobiales* it is flanked by a Zn-dependent protease and the  
210 dihydroneopterin aldolase. This last arrangement, in which the dihydroneopterin aldolase is followed  
211 by a 2-amino-4-hydroxy-6-hydroxymethyldihydropteridine diphosphokinase is also part of the  
212 genetic surroundings of *folP* in most Actinobacteria (Figure 1C).

### 213 3.2 Phylogenetic analysis of *sul/folP* and *glmM* genes

214 The presence of a signature two-amino acid insertion characteristic of *sul* gene products in  
215 chromosomally-encoded FolP\* proteins and the identification of a genetic environment for *sul2* genes  
216 that is conserved in multiple bacterial genomes suggested that it might be possible to pinpoint the  
217 evolutionary origin of *sul* genes. To further investigate this possibility, we performed a rigorous  
218 phylogenetic analysis of FolP/Sul protein sequences. We sampled a representative genome of all  
219 bacterial orders with complete genome assemblies, of each bacterial family for the Proteobacteria and  
220 all available complete genomes for clades of interest (*Rhodobiaceae*, Spirochaetes and Chlamydiae),  
221 and we identified chromosomally-encoded FolP homologs in each of these genomes using BLASTP  
222 with the *E. coli* FolP protein as a query. We used a distance tree generated with CLUSTALW to  
223 identify and discard a set of protein sequences from duplicated *folP* genes in the Actinobacteria  
224 (Supplementary material 7), and we performed multiple sequence alignment and Bayesian phylogenetic  
225 reconstruction of the remaining FolP/Sul sequences with T-COFFEE and MrBayes (Supplementary  
226 material 8).

227 The resulting tree (Figure 2) provides strong support for the hypothesis that *sul1-3* genes originated in  
228 the *Rhodobiaceae* and *Leptospiraceae* families. In particular, the topology inferred by MrBayes  
229 suggests that the *Leptospiraceae folP\** gene gave rise to both *sul3* and the *folP\** gene encountered in  
230 the *Rhodobiaceae*, most likely through a lateral gene transfer event in an ancestor of this  
231 Alphaproteobacteria family. According to the reconstructed FolP phylogeny, the *Rhodobiaceae folP\**  
232 gene was subsequently mobilized as *sul2*, and later evolved into the integron-borne *sul1* gene [44].  
233 The fact that the *Leptospiraceae FolP\** sequences branch independently of other Spirochaetes  
234 sequences and immediately after the Chlamydiae suggests that the *Leptospiraceae folP\** gene might  
235 have originated as a result of lateral gene transfer event from the Chlamydiae, and that it  
236 subsequently incorporated the signature two-amino acid insert present in *sul*-encoded DHPS proteins.

237 The existence of a genetic environment for *sul2* genes conserved in bacterial chromosomes provides  
238 the means to independently assess the likelihood of the evolutionary scenario inferred from the FolP  
239 phylogeny. Using the same sampling methods utilized for *sul/folP* protein products, we collected  
240 protein sequences for phosphoglucosamine mutase (GlmM) homologs and performed Bayesian  
241 phylogenetic inference on the aligned N-terminal regions. The resulting GlmM tree (Figure 3)  
242 provides further support for a *Rhodobiaceae* origin of the *sul2* gene, with the *sul2*-associated GlmM  
243 sequences branching with the *Rhodobiaceae* GlmM protein sequences deep within an otherwise  
244 monophyletic Alphaproteobacteria clade. Taken together, the consistent branching with the  
245 *Rhodobiaceae* of the protein sequences encoded by both *sul2* and its accompanying *glmM* gene  
246 fragment firmly establish this Alphaproteobacteria family as the chromosomal origin for the *sul2*  
247 gene. The phylogenetic evidence thus indicates that the *sul2* gene was excised with the N-terminal  
248 fragment of the *glmM* gene during the mobilization event that led to their incorporation into plasmid  
249 vectors. Given that the *folP-glmM* arrangement is only seen in the Proteobacteria, this also excludes  
250 the possibility that the *sul2* gene was mobilized directly from a *Leptospiraceae* background, where  
251 the *folP* gene presents an unrelated, yet conserved, genomic environment (Figure 1C).

### 252 3.3 Analysis of *sul/folP* and *glmM* gene sequences

253 The phylogenetic analysis of FolP and GlmM sequences puts forward an evolutionary scenario  
254 wherein the *Leptospiraceae folP\** was transferred to the members of the *Rhodobiaceae* family before  
255 being mobilized independently into the *sul3*- and *sul1/2*-harboring mobile genetic elements reported  
256 in sulfonamide-resistant clinical isolates. To further investigate this hypothesis, we undertook a  
257 systematic analysis of *folP* and *glmM* coding sequences. We compiled *folP* gene sequences for all the

258 FolP proteins included in the phylogenetic analysis (Figure 2), as well as any *sul* gene sequences with  
259 less than 90% identity to those reported in the literature and any chromosomal *folP*\* genes encoding a  
260 DHPS with the signature Sul motif (Figure 1A) for which there were at least 1 Mbp of whole genome  
261 shotgun sequence data (Supplementary material 9). We computed the overall and codon-position %GC  
262 content on both the *folP/sul* coding sequences and all the available coding sequences in their  
263 respective genome assembly (Supplementary material 10). The %GC content data (Figure 4A) reveals  
264 that *sul1/2* sequences have a high %GC content (60.76 SD±1.42) that is consistent with their origin  
265 as mobilized *Rhodobiaceae folP*\* sequences (%GC content: 62.02 SD±2.22). Similarly, *sul3*  
266 sequences display a %GC content (38.14 SD±0.55) consistent with their mobilization from a  
267 *Leptospiraceae folP*\* background (39.39 SD±4.17). Together with the phylogenetic inference results,  
268 these data provide strong support for an independent mobilization of *sul1/2* and *sul3* genes from,  
269 respectively, *Rhodobiaceae* and *Leptospiraceae* chromosomal backgrounds.

270 The independent mobilization of *sul1/2* and *sul3* is underpinned by a preceding lateral gene transfer  
271 of *folP*\* from the *Leptospiraceae* into a *Rhodobiaceae* ancestor. In this context, the substantial  
272 divergence in %GC content between the chromosomal *folP*\* genes of both clades indicates a long  
273 process of amelioration. In fact, statistical analysis of the differences in codon position %GC content  
274 between *folP* genes and all available coding sequences in their respective genomes shows that  
275 *Leptospiraceae* and *Rhodobiaceae folP*\* genes encoding proteins with the Sul motif cannot be  
276 distinguished from other *folP* genes (one-sided Mann-Whitney U-test  $p > 0.05$  for GC1, GC2 and  
277 GC3) (Figure 4B) (Supplementary material 10). We used Ameliorator [32] to estimate the time required  
278 for the observed amelioration via forward simulation from *Leptospiraceae* codon position %GC  
279 values. Even under assumptions of fast evolutionary change, the software provides a lower bound of  
280 476 million years for the observed amelioration of the *Leptospiraceae folP*\* gene into the  
281 *Rhodobiaceae* one. Statistical analysis of synonymous and non-synonymous mutation patterns in the  
282 N- and C-terminal regions of the *glmM* gene also shows that mutation patterns in each region of the  
283 *Rhodobiaceae glmM* gene are indistinguishable from those observed in other *glmM* genes (one-sided  
284 Mann-Whitney U-test  $p > 0.05$ ), indicating that the *glmM* gene fragment associated with *sul* genes  
285 was not transferred from a mobile element into the *Rhodobiaceae* (Supplementary material 11).

### 286 3.4 Sulfonamide resistance of chromosomal *folP* genes

287 Phylogenetic and sequence analysis results indicate that chromosomal *folP*\* genes encoding proteins  
288 with the signature Sul motif were independently mobilized into the *sul1-3*-harboring mobile elements  
289 found in sulfonamide-resistant clinical isolates, but they do not address whether the presence of this  
290 motif is associated with sulfonamide resistance. To investigate this possibility, we cloned the *folP*  
291 gene coding for DHPS in the *Rhodobiaceae P. lavamentivorans* DS-1 (WP\_012111048), the  
292 *Leptospiraceae L. interrogans* serovar Lai str. 56601 (WP\_000444207), the *Rhodobacteraceae R.*  
293 *sphaeroides* 2.4.1 (WP\_011337038) and the Chlamydiae *C. trachomatis* D/UW-3/CX  
294 (WP\_009871981). Following Clinical and Laboratory Standards Institute (CLSI) guidelines [38], we  
295 then performed broth microdilution assays to determine the minimal inhibitory concentration (MIC)  
296 of sulfamethoxazole. The results shown in Table 1 reveal that both *P. lavamentivorans* and *L.*  
297 *interrogans* chromosomal *folP*\* genes confer resistance to sulfamethoxazole in an *E. coli* strain  
298 sensitive to sulfonamides. In contrast, *C. trachomatis folKP* does not confer significant resistance to  
299 sulfamethoxazole. Moreover, our results show that complementation with *folP* genes from another  
300 Alphaproteobacteria family lacking the Sul motif, the *Rhodobacteraceae*, does not confer resistance.  
301 These results reveal that the chromosomal *folP*\* genes that gave rise to *sul* genes are capable of  
302 conferring resistance to sulfonamide in *E. coli*. The fact that complementation with *C. trachomatis*  
303 and *R. sphaeroides* 2.4.1 *folP*, both lacking the Sul motif, does not confer resistance in the *E. coli*

304 background suggests that sulfonamide resistance in the chromosomal *folP* genes identified here likely  
305 originated with protein sequence changes linked to the signature two-amino acid insertion  
306 characteristic of mobile *sul* genes and chromosomal *folP*\* genes.

## 307 4 Discussion

### 308 4.1 Elucidation of the chromosomal origins of *sul1-3* genes

309 The introduction of sulfonamides in the late 1930's was soon followed by the emergence of  
310 resistance due primarily to mutations in chromosomal *folP* genes [7]. In this context, the most  
311 plausible hypothesis for the origin of mobilized *folP* homologs (the *sul* genes) conferring resistance  
312 to sulfonamides might appear to involve the uptake by mobile elements of chromosomal *folP* genes  
313 that had undergone selection for sulfonamide resistance upon its introduction as a systemic  
314 chemotherapeutic agent. Our analysis, however, indicates that the *sul1-3* genes responsible for  
315 sulfonamide resistance in clinical isolates did not arise from recently mutated chromosomal *folP*  
316 genes. Instead, our results imply that *sul1-3* originated via the independent mobilization of a  
317 chromosomal *folP*\* gene that had been horizontally transferred at least once between divergent  
318 bacterial clades (Figure 5). This evolutionary scenario is supported by several complementary lines of  
319 evidence. The identification of a conserved region incorporating a signature two-amino acid insertion  
320 shared by all reported *sul1-3* gene instances and members of the two posited donor families  
321 (*Rhodobiaceae* and *Leptospiraceae*) (Figure 1AB) provides strong support for a common origin of  
322 these sequences. This result is substantiated by the solidly supported branching of Sul1-3 protein  
323 sequences with members of the *Rhodobiaceae* and *Leptospiraceae* families in the reconstructed  
324 FolP/Sul molecular phylogeny (Figure 2). Importantly, the trimmed multiple sequence alignment used  
325 for FolP/Sul Bayesian phylogenetic inference (Supplementary material 8) does not incorporate the two-  
326 amino acid insertion of the Sul motif, indicating that the joint branching of Sul1-3 sequences with  
327 chromosomally-encoded *Rhodobiaceae* and *Leptospiraceae* FolP proteins is based on sequence  
328 similarity beyond this insertion and its immediate vicinity (Figure 1AB).

329 The presence of *glmM* gene fragments downstream of *sul2* genes in *sul2* isolates (Supplementary  
330 material 1) and the presence of a similar arrangement in the Proteobacteria (Figure 1C) provide an  
331 independent means for assessing the origin of *sul2* genes. Phylogenetic inference results for the N-  
332 terminal region of GlmM (Figure 3) are consistent with those observed for FolP (Figure 2), and clearly  
333 define a last common ancestor between the *Rhodobiaceae* and *sul2*-associated *glmM* genes. Analysis  
334 of synonymous and non-synonymous substitutions among *Rhodobiaceae glmM* genes suggests that  
335 the *glmM* gene has undergone similar patterns of selection regardless of its association to *folP* genes  
336 encoding the signature two-amino acid insertion (Supplementary material 11). Since the *glmM* gene  
337 fragment associated to *sul2* genes is likely to be non-functional and subject to genetic drift, the  
338 absence of diverging substitution patterns between the N- and C-terminal regions of *Rhodobiaceae*  
339 *glmM* sequences indicates that the *glmM* and *sul2* genes were transferred from the *Rhodobiaceae* to  
340 *sul2*-harboring vectors, and not vice versa. Lastly, given that gene loss is much more likely than gain  
341 [45], the absence of *glmM* fragments in *sul1* isolates supports in turn the notion that *sul1* derived  
342 from *sul2*. This is consistent with the branching pattern observed in the FolP/Sul tree (Figure 2),  
343 which defines a scenario of independent mobilization of *sul3* from the *Leptospiraceae* and *sul2* from  
344 the *Rhodobiaceae*, with the subsequent uptake of *sul1* by class 1 integrons.

345 The analysis of *folP* codon %GC content provides further evidence for the evolutionary scenario  
346 outlined above (Figure 5). The %GC content of *sul3* genes is very similar to that of *Leptospiraceae*  
347 *folP* sequences, whereas those of *sul2* and *sul1* closely match *Rhodobiaceae folP* genes. Given that



348 more than thirty years elapsed between the introduction of sulfonamides and the detection of *sul*-  
349 harboring vectors [7], it is reasonable to assume that *sul* genes were mobilized from chromosomal  
350 origins some period of time after the discovery of sulfonamide. Sequence evolution models indicate  
351 that, even under fast-evolution scenarios, amelioration from *sul3* to *sul1/2* %GC content (or vice  
352 versa) is not feasible in such a short time [32]. In fact, forward simulations suggest that an  
353 evolutionary span of at least 476 million years is required to achieve such rates of amelioration. This  
354 is congruent with the transfer of *folP*<sup>\*</sup> from the *Leptospiraceae* to the *Rhodobiaceae* taking place  
355 after the inferred diversification of the Alphaproteobacteria into its constituent families some 1,500  
356 million years ago [34]. This timeline is also consistent with the analysis of %GC content, which  
357 shows evidence of complete amelioration in *Rhodobiaceae folP*<sup>\*</sup> genes (Figure 4B). Such an ancestral  
358 gene transfer event is also congruent with the lack of canonical telltale signs of lateral gene transfer  
359 in either chromosomal background, such as the presence of transposase/integrase genes in the  
360 immediate vicinity of *folP*<sup>\*</sup>, with the substantial diversity of genomic surroundings observed for the  
361 *folP* gene in the Alphaproteobacteria (Figure 1C), and with the overlap in habitats between both  
362 bacterial families [46,47]. Taken together, these results provide strong support for the hypothesis that  
363 the *sul1-3* genes present in clinical isolates were mobilized from chromosomal *Leptospiraceae* and  
364 *Rhodobiaceae* backgrounds following the introduction of sulfonamides in the late 1930's.

## 365 4.2 Prevalence of sulfonamide resistance in ancestral bacteria

366 Several independent lines of evidence converge towards an evolutionary scenario in which *sul1-3*  
367 genes from clinical isolates derive from ancestral chromosomal mutations in the *folP*<sup>\*</sup> gene of the  
368 *Leptospiraceae* and the *Rhodobiaceae* (Figure 5). This raises several important questions regarding  
369 the nature and impact of such chromosomal mutations, the selective pressures underpinning their  
370 origin and transfer in ancient bacteria, and their subsequent mobilization into the resistance *sul* genes  
371 found in clinical isolates. Minimum inhibitory concentration (MIC) assays confirm that both the  
372 *Leptospiraceae* and the *Rhodobiaceae folP*<sup>\*</sup> genes provide a level of resistance to sulfamethoxazole  
373 comparable to that provided by *sul2* gene in an *E. coli* background, whereas complementation with a  
374 *Rhodobacteraceae folP* does not confer resistance (Table 1). These data are in agreement with  
375 previous reporting of sulfonamide resistance in multiple *L. interrogans* strains [48–50], and suggest  
376 that the observed resistance was likely due to mutations in the *Leptospiraceae* chromosomal *folP*<sup>\*</sup>  
377 gene rather than to the presence of plasmid-borne *sul* genes.

378 In contrast with the *Leptospiraceae* and the *Rhodobiaceae folP*<sup>\*</sup> genes, the chromosomal *folKP* gene  
379 of the Chlamydiae, which encodes a DHPS lacking the Sul motif, does not confer resistance to  
380 sulfamethoxazole (Table 1). This is in agreement with abundant reports of sulfonamide susceptibility  
381 in several *Chlamydia* species [51–54]. Since the Chlamydiae *folKP* gene is the most closely related  
382 chromosomal *folP* gene to the cluster encompassing the *sul* genes and the *Leptospiraceae* and the  
383 *Rhodobiaceae folP*<sup>\*</sup> (Figure 2), the lack of resistance in Chlamydiae *folKP* genes strongly suggests  
384 that changes in the region encompassing the Sul motif may be responsible for the observed  
385 resistance. This region is located in a connector loop within the N-terminal 'pole' of the eight-  
386 stranded  $\alpha/\beta$  barrel of DHPS, which is involved in sulfonamide recognition [39,40]. The two-amino  
387 acid insertion might hence result in decreased affinity for sulfonamide by locally disrupting folding  
388 as has been proposed previously for similar insertions [55].

389 The emergence and maintenance of a sulfonamide-resistant *folP*<sup>\*</sup> gene in the *Leptospiraceae* and its  
390 subsequent transfer to the *Rhodobiaceae* suggests that it might convey some selective advantage, but  
391 the advent of mutations providing significant resistance and their subsequent spread could also have  
392 been fortuitous. The appearance of sulfonamide-resistance mutations in chromosomal *folP* genes has

393 been amply documented [7,13], and these were in fact the primary drivers of sulfonamide resistance  
394 following the introduction of sulfa drugs [7]. Furthermore, it has been documented that the presence  
395 of sulfonamide resistant DHPS does not necessarily impose a fitness cost [56]. Structural studies  
396 have suggested that most sulfonamide resistance mutations act by modulating accessibility of  
397 sulfonamides to the PABA-binding pocket without hindering PABA binding [40,57].

398 It is hence conceivable that naturally occurring mutations conferring resistance to sulfonamide might  
399 not be selected against in the absence of this chemotherapeutic agent. Subsequent complementary  
400 changes to adjust the affinity for PABA of the altered DHPS molecule may have resulted in fixation  
401 of the original mutations conferring resistance to sulfonamide [58]. Alternatively, sulfonamide  
402 resistance mutations in *folP* may have arisen and persisted in response to naturally occurring  
403 sulfonamides produced by competing organisms. Sulfonamides are rare in nature, with only eight  
404 known natural sulfonamides reported to date [59]. Of these, only two naturally occurring  
405 sulfonamides are aryl sulfonamides, produced in very small amounts by recombinant *Streptomyces*  
406 species harboring the complete xiamycin biosynthesis gene cluster [60]. Although these sulfonamides  
407 show potent antimicrobial activity, their bulky substitution pattern suggests that their mode of action  
408 and molecular target are likely different from synthetic aryl sulfonamides [60].

### 409 4.3 Mobilization of ancestral resistance reservoirs

410 The phylogenetic inference and genomic analysis results reported in this work uphold an  
411 evolutionary scenario wherein chromosomally-encoded sulfonamide resistant *folP* variants were  
412 independently mobilized from *Leptospiraceae* and *Rhodobiaceae* backgrounds following the clinical  
413 introduction of synthetic aryl sulfonamides, giving rise to the *sul1/2* and *sul3* genes routinely  
414 detected in clinical isolates (Figure 5). The rapid mobilization and dissemination of genes conferring  
415 resistance to antibiotic and chemotherapeutic agents upon the clinical or agricultural use of these  
416 compounds has been amply documented [4,61]. Mobilization and spread may be mediated by  
417 plasmids encoding transposons and integrons, as well as integrative and conjugative elements, mobile  
418 pathogenicity islands and bacteriophages, but the common tenet is that sustained exposure of  
419 bacterial populations to antibiotics or chemotherapeutic agents induces a strong selective pressure to  
420 elicit the mobilization of resistance determinants [61].

421 Together with penicillin and tetracycline, sulfonamides have been the antibacterial agents most  
422 frequently used at sub-therapeutic levels in livestock production [62], and it has been reported that  
423 sulfonamides have higher mobility, low removal efficiency and deeper environmental penetration  
424 than most other antibacterial agents [63]. The widespread and intensive use of sulfonamides in  
425 agriculture, aquaculture and animal husbandry since the mid 1960's, and their persistence in soil,  
426 sediments and subterranean aquatic communities where *Leptospiraceae* and *Rhodobiaceae* abound,  
427 provides an ample window of opportunity for the mobilization of chromosomally-encoded *folP*<sup>\*</sup>  
428 genes within these bacterial communities and the subsequent transfer of these mobile resistance  
429 determinants to other bacteria.

430 Recent mobilization from a Chloroflexi chromosomal *folP* background has been postulated as the  
431 likely origin of the *sul4* gene [22], and this result is in agreement with the phylogenetic analysis  
432 reported here (Figure 2). In the case of the chromosomal *folP*<sup>\*</sup> identified here and their mobilization  
433 into *sul*-harboring resistance vectors, several sources of evidence provide additional support for the  
434 mobilization of chromosomal *folP* genes. For instance, phylogenetic evidence (Figure 2) indicates that  
435 the *Rhodobiaceae folP*<sup>\*</sup> was incorporated at some point by the Actinobacterium *Amycolatopsis*,  
436 which harbors three *folP* orthologs (Supplementary material 12). Similarly, a plasmid broadly

437 distributed among *Azospirillum* plasmids (e.g. AP010951, FQ311873), a member of the  
 438 *Rhodospirillaceae* Alphaproteobacteria family, contains a *folP* gene flanked by genes coding for a  
 439 flagellar export pore protein (FlhB) and the full length phosphoglucosamine mutase (GlmM)  
 440 (Supplementary material 12). This *folP* does not contain the signature two-amino acid insertion,  
 441 indicating that its mobilization occurred independently of those leading to *sul1/2* genes.

442 More significantly, a partial genomic sequence from a *Pseudomonas aeruginosa* isolate  
 443 (LLMY01000073.1) harbors a *folP*<sup>\*</sup> gene with high sequence and genetic neighborhood similarity to  
 444 the *Rhodobiaceae* *P. lavamentivorans* DS-1 [64]. The genes immediately upstream and downstream  
 445 of this *P. aeruginosa folP*<sup>\*</sup>, which contains the *sul* motif, encode a TetR family regulator and a partial  
 446 phosphoglucosamine mutase (GlmM) protein (Supplementary material 12). These three genes are  
 447 flanked by IS91 and ISL3 family transposases. Importantly, the IS91 transposase contains similar  
 448 sequence motifs and shares termini identity with ISCR elements, which are present in both *sul1* and  
 449 *sul2*-harboring plasmids [65,66]. It is hence highly likely that the *P. aeruginosa folP* represents an  
 450 intermediate step in the original mobilization of *sul1/2* from a *Rhodobiaceae* background.

451 Metagenomics analysis and prospective studies of preserved ancient environments, such as  
 452 permafrost and remote cave habitats, have largely displaced the notion that antibiotic resistance  
 453 emerges in response to anthropogenic antibiotic use [67–70]. These studies have conclusively shown  
 454 that antibiotic resistance predates the use of antibiotics by humans, and that it is widely distributed  
 455 across the bacterial pangenome. In a few isolated cases, resistance determinants for synthetic  
 456 chemotherapeutic agents that predate or have rapidly arisen upon human use has been documented,  
 457 but their existence can be attributed to cross-resistance to naturally-occurring antibiotics (e.g.  
 458 microcin B17 for quinolones [6], sisomicin for amikacin [69]). The identification in this work of  
 459 ancient chromosomal mutations in *folP* conferring resistance to sulfonamide as the likely origins of  
 460 the *sul1-3* genes present in sulfonamide-resistant clinical isolates puts forward an alternative  
 461 scenario. Given the absence of known naturally occurring aryl sulfonamides targeting DHPS, our  
 462 results suggest that resistance to novel synthetic chemotherapeutic agents may be already available in  
 463 the vast microbial pangenome, and that its mobilization and global dissemination can take place in a  
 464 very short amount of time upon the clinical introduction of novel chemotherapeutic compounds.

## 465 5 Tables

466 **Table 1** – Broth microdilution assays. Minimum inhibitory concentrations (MICs) of sulfamethoxazole in  
 467 wild-type *Escherichia coli* CGSC5073 carrying different versions of pUA1108::*folP*; Pl, *Parvibaculum*  
 468 *lavamentivorans*; Li, *Leptospira interrogans*; Ct, *Chlamydia trachomatis*; Rs, *Rhodobacter sphaeroides*.

|                                                                      | Sulfamethoxazole<br>(mg/L) |
|----------------------------------------------------------------------|----------------------------|
| <i>Escherichia coli</i> CGSC5073                                     | 8                          |
| <i>Escherichia coli</i> CGSC5073 pUA1108                             | 8                          |
| <i>Escherichia coli</i> CGSC5073 pUA1108:: <i>folP</i> <sub>Pl</sub> | >512                       |
| <i>Escherichia coli</i> CGSC5073 pUA1108:: <i>folP</i> <sub>Li</sub> | 512                        |
| <i>Escherichia coli</i> CGSC5073 pUA1108:: <i>folP</i> <sub>Ct</sub> | 4                          |
| <i>Escherichia coli</i> CGSC5073 pUA1108:: <i>folP</i> <sub>Rs</sub> | 8                          |
| <i>Escherichia coli</i> CGSC5073 pUA1108:: <i>sul2</i>               | >512                       |

469

## 470 **6 Conflict of Interest**

471 The authors declare that the research was conducted in the absence of any commercial or financial  
472 relationships that could be construed as a potential conflict of interest.

## 473 **7 Author Contributions**

474 MSO and IE performed the *in silico* analyses. MSO and IE developed scripts for genomic analyses  
475 and ran phylogenetic inference methods. MSO and PC performed the *in vitro* analyses. All authors  
476 discussed the findings and interpreted the results. IE and JB conceived the experiment and  
477 coordinated the research. IE and MSO drafted the manuscript.

## 478 **8 Funding**

479 This work was supported by grant BIO2016-77011-R from the Spanish Ministerio de Economía y  
480 Competitividad to JB. MSO is the recipient of a predoctoral fellowship from the Ministerio de  
481 Educación, Cultura y Deporte de España.

## 482 **9 Acknowledgments**

483 The authors wish to thank Joan Ruiz and Susana Escribano for their technical support during some of  
484 the experimental procedures, as well as Júlia López for her continued support.

## 485 **10 Supplementary Material**

486 The Supplementary Material for this article can be found online at:

## 487 **11 Data Availability Statement**

488 The datasets used in this study can all be freely accessed at the NCBI GenBank/RefSeq databases  
489 (<https://www.ncbi.nlm.nih.gov/>). All scripts used for analysis can be obtained at the GitHub ErillLab  
490 repository (<https://github.com/ErillLab/>).

## 491 **12 References**

- 492 1. Carlet J, Rambaud C, Pulcini C. Save Antibiotics: a call for action of the World Alliance  
493 Against Antibiotic Resistance (WAAAR). *BMC Infect Dis.* 2014;14: 436. doi:10.1186/1471-  
494 2334-14-436
- 495 2. Rossolini GM, Arena F, Pecile P, Pollini S. Update on the antibiotic resistance crisis. *Curr Opin*  
496 *Pharmacol.* 2014;18: 56–60. doi:10.1016/j.coph.2014.09.006
- 497 3. Davies J, Davies D. Origins and Evolution of Antibiotic Resistance. *Microbiol Mol Biol Rev.*  
498 2010;74: 417–433. doi:10.1128/MMBR.00016-10
- 499 4. Aminov RI, Mackie RI. Evolution and ecology of antibiotic resistance genes. *FEMS Microbiol*  
500 *Lett.* 2007;271: 147–161. doi:10.1111/j.1574-6968.2007.00757.x
- 501 5. Hooper DC. Mechanisms of fluoroquinolone resistance. *Drug Resist Updat.* 1999;2: 38–55.  
502 doi:10.1054/drup.1998.0068

- 503 6. Tran JH, Jacoby GA. Mechanism of plasmid-mediated quinolone resistance. *Proc Natl Acad Sci*  
504 *U S A.* 2002;99: 5638–5642. doi:10.1073/pnas.082092899
- 505 7. Sköld O. Sulfonamide resistance: mechanisms and trends. *Drug Resist Updat.* 2000;3: 155–160.
- 506 8. Mitsuhashi S. Drug Resistance in Bacteria: History, Genetics and Biochemistry. *J Int Med Res.*  
507 1993;21: 1–14. doi:10.1177/030006059302100101
- 508 9. Domagk G. Ein Beitrag zur Chemotherapie der bakteriellen Infektionen. *Dtsch Med*  
509 *Wochenschr.* 1935;61: 250–253. doi:10.1055/s-0028-1129486
- 510 10. Aminov RI. A Brief History of the Antibiotic Era: Lessons Learned and Challenges for the  
511 Future. *Front Microbiol.* 2010;1. doi:10.3389/fmicb.2010.00134
- 512 11. Davenport D. The war against bacteria: how were sulphonamide drugs used by Britain during  
513 World War II? *Med Humanit.* 2012;38: 55–58. doi:10.1136/medhum-2011-010024
- 514 12. Landy M, Larkum NW, Oswald EJ, Streightoff F. Increased synthesis of p-aminobenzoic acid  
515 associated with the development of sulfonamide resistance in *Staphylococcus aureus*. *Science.*  
516 1943;97: 265–267. doi:10.1126/science.97.2516.265
- 517 13. Huovinen P, Sundström L, Swedberg G, Sköld O. Trimethoprim and sulfonamide resistance.  
518 *Antimicrob Agents Chemother.* 1995;39: 279–289. doi:10.1128/AAC.39.2.279
- 519 14. Rådström P, Fermér C, Kristiansen BE, Jenkins A, Sköld O, Swedberg G. Transformational  
520 exchanges in the dihydropteroate synthase gene of *Neisseria meningitidis*: a novel mechanism  
521 for acquisition of sulfonamide resistance. *J Bacteriol.* 1992;174: 6386–6393.  
522 doi:10.1128/jb.174.20.6386-6393.1992
- 523 15. Haasum Y, Ström K, Wehelie R, Luna V, Roberts MC, Maskell JP, et al. Amino Acid  
524 Repetitions in the Dihydropteroate Synthase of *Streptococcus pneumoniae* Lead to Sulfonamide  
525 Resistance with Limited Effects on Substrate Km. *Antimicrob Agents Chemother.* 2001;45:  
526 805–809. doi:10.1128/AAC.45.3.805-809.2001
- 527 16. Fermer C, Kristiansen BE, Sköld O, Swedberg G. Sulfonamide resistance in *Neisseria*  
528 *meningitidis* as defined by site-directed mutagenesis could have its origin in other species. *J*  
529 *Bacteriol.* 1995;177: 4669–4675. doi:10.1128/jb.177.16.4669-4675.1995
- 530 17. Swedberg G, Ringertz S, Sköld O. Sulfonamide Resistance in *Streptococcus pyogenes* Is  
531 Associated with Differences in the Amino Acid Sequence of Its Chromosomal Dihydropteroate  
532 Synthase. *Antimicrob Agents Chemother.* 1998;42: 1062–1067.
- 533 18. Rådström P, Swedberg G, Sköld O. Genetic analyses of sulfonamide resistance and its  
534 dissemination in gram-negative bacteria illustrate new aspects of R plasmid evolution.  
535 *Antimicrob Agents Chemother.* 1991;35: 1840–1848. doi:10.1128/AAC.35.9.1840
- 536 19. Enne VI, Livermore DM, Stephens P, Hall LM. Persistence of sulphonamide resistance in  
537 *Escherichia coli* in the UK despite national prescribing restriction. *The Lancet.* 2001;357: 1325–  
538 1328. doi:10.1016/S0140-6736(00)04519-0

- 539 20. Treeck U van, Schmidt F, Wiedemann B. Molecular nature of a streptomycin and sulfonamide  
540 resistance plasmid (pBP1) prevalent in clinical *Escherichia coli* strains and integration of an  
541 ampicillin resistance transposon (TnA). *Antimicrob Agents Chemother.* 1981;19: 371–380.  
542 doi:10.1128/AAC.19.3.371
- 543 21. Perreten V, Boerlin P. A New Sulfonamide Resistance Gene (sul3) in *Escherichia coli* Is  
544 Widespread in the Pig Population of Switzerland. *Antimicrob Agents Chemother.* 2003;47:  
545 1169–1172. doi:10.1128/AAC.47.3.1169-1172.2003
- 546 22. Razavi M, Marathe NP, Gillings MR, Flach C-F, Kristiansson E, Joakim Larsson DG.  
547 Discovery of the fourth mobile sulfonamide resistance gene. *Microbiome.* 2017;5: 160.  
548 doi:10.1186/s40168-017-0379-y
- 549 23. Altschul SF, Madden TL, Schaffer AA, Zhang J, Zhang Z, Miller W, et al. Gapped BLAST and  
550 PSI-BLAST: a new generation of protein database search programs. *Nucleic Acids Res.*  
551 1997;25: 3389–402.
- 552 24. Colaert N, Helsens K, Martens L, Vandekerckhove J, Gevaert K. Improved visualization of  
553 protein consensus sequences by iceLogo. *Nat Methods.* 2009;6: 786–787.  
554 doi:10.1038/nmeth1109-786
- 555 25. Thompson JD, Higgins DG, Gibson TJ. CLUSTAL W: improving the sensitivity of progressive  
556 multiple sequence alignment through sequence weighting, position-specific gap penalties and  
557 weight matrix choice. *Nucleic Acids Res.* 1994;22: 4673–80.
- 558 26. Notredame C, Higgins DG, Heringa J. T-Coffee: A novel method for fast and accurate multiple  
559 sequence alignment. *J Mol Biol.* 2000;302: 205–17.
- 560 27. Castresana J. Selection of Conserved Blocks from Multiple Alignments for Their Use in  
561 Phylogenetic Analysis. *Mol Biol Evol.* 2000;17: 540–552.
- 562 28. Dereeper A, Guignon V, Blanc G, Audic S, Buffet S, Chevenet F, et al. Phylogeny.fr: robust  
563 phylogenetic analysis for the non-specialist. *Nucleic Acids Res.* 2008;36: W465-469.  
564 doi:10.1093/nar/gkn180
- 565 29. Ronquist F, Huelsenbeck JP. MrBayes 3: Bayesian phylogenetic inference under mixed models.  
566 *Bioinformatics.* 2003;19: 1572–4.
- 567 30. Nei M, Gojobori T. Simple methods for estimating the numbers of synonymous and  
568 nonsynonymous nucleotide substitutions. *Mol Biol Evol.* 1986;3: 418–426.  
569 doi:10.1093/oxfordjournals.molbev.a040410
- 570 31. Suyama M, Torrents D, Bork P. PAL2NAL: robust conversion of protein sequence alignments  
571 into the corresponding codon alignments. *Nucleic Acids Res.* 2006;34: W609-612.  
572 doi:10.1093/nar/gkl315
- 573 32. Lawrence JG, Ochman H. Amelioration of bacterial genomes: rates of change and exchange. *J*  
574 *Mol Evol.* 1997;44: 383–97.

- 575 33. Altenhoff AM, Glover NM, Train C-M, Kaleb K, Warwick Vesztrocy A, Dylus D, et al. The  
576 OMA orthology database in 2018: retrieving evolutionary relationships among all domains of  
577 life through richer web and programmatic interfaces. *Nucleic Acids Res.* 2018;46: D477–D485.  
578 doi:10.1093/nar/gkx1019
- 579 34. Battistuzzi FU, Feijao A, Hedges SB. A genomic timescale of prokaryote evolution: insights  
580 into the origin of methanogenesis, phototrophy, and the colonization of land. *BMC Evol Biol.*  
581 2004;4: 44. doi:10.1186/1471-2148-4-44
- 582 35. Honda Y, Sakai H, Hiasa H, Tanaka K, Komano T, Bagdasarian M. Functional division and  
583 reconstruction of a plasmid replication origin: molecular dissection of the oriV of the broad-  
584 host-range plasmid RSF1010. *Proc Natl Acad Sci U S A.* 1991;88: 179–183.
- 585 36. Kushner SR. An improved method for transformation of *Escherichia coli* with ColE1 derived  
586 plasmids. In: Boyer HW, Nicosia S, editors. *Genetic Engineering.* Amsterdam: Elsevier/North-  
587 Holland Biomedical Press; 1978. pp. 17–23.
- 588 37. Mayola A, Irazoki O, Martínez IA, Petrov D, Menolascina F, Stocker R, et al. RecA protein  
589 plays a role in the chemotactic response and chemoreceptor clustering of *Salmonella enterica*.  
590 *PloS One.* 2014;9: e105578. doi:10.1371/journal.pone.0105578
- 591 38. Clinical and Laboratory Standards Institute. *Methods for dilution antimicrobial susceptibility*  
592 *tests for bacteria that grow aerobically - Approved Standard. Sixth edition.* Wayne, Pa. USA:  
593 Clinical and Laboratory Standards Institute; 2003.
- 594 39. Rådström P, Swedberg G. RSF1010 and a conjugative plasmid contain sulIII, one of two known  
595 genes for plasmid-borne sulfonamide resistance dihydropteroate synthase. *Antimicrob Agents*  
596 *Chemother.* 1988;32: 1684–1692.
- 597 40. Morgan RE, Batot GO, Dement JM, Rao VA, Eadsforth TC, Hunter WN. Crystal structures of  
598 *Burkholderia cenocepacia* dihydropteroate synthase in the apo-form and complexed with the  
599 product 7,8-dihydropteroate. *BMC Struct Biol.* 2011;11: 21. doi:10.1186/1472-6807-11-21
- 600 41. Mehra-Chaudhary R, Mick J, Beamer LJ. Crystal Structure of *Bacillus anthracis*  
601 Phosphoglucosamine Mutase, an Enzyme in the Peptidoglycan Biosynthetic Pathway. *J*  
602 *Bacteriol.* 2011;193: 4081–4087. doi:10.1128/JB.00418-11
- 603 42. Kehrenberg C, Schwarz S. dfrA20, A novel trimethoprim resistance gene from *Pasteurella*  
604 *multocida*. *Antimicrob Agents Chemother.* 2005;49: 414–417. doi:10.1128/AAC.49.1.414-  
605 417.2005
- 606 43. Hu LF, Xu XH, Yang HF, Ye Y, Li JB. Role of sul2 gene linked to transposase in resistance to  
607 trimethoprim/sulfamethoxazole among *Stenotrophomonas maltophilia* isolates. *Ann Lab Med.*  
608 2016;36: 73–75. doi:10.3343/alm.2016.36.1.73
- 609 44. Orman BE, Piñeiro SA, Arduino S, Galas M, Melano R, Caffer MI, et al. Evolution of  
610 multiresistance in nontyphoid salmonella serovars from 1984 to 1998 in Argentina. *Antimicrob*  
611 *Agents Chemother.* 2002;46: 3963–3970.

- 612 45. Kannan L, Li H, Rubinstein B, Mushegian A. Models of gene gain and gene loss for  
613 probabilistic reconstruction of gene content in the last universal common ancestor of life. *Biol*  
614 *Direct*. 2013;8: 32. doi:10.1186/1745-6150-8-32
- 615 46. Macedo AJ, Timmis KN, Abraham W-R. Widespread capacity to metabolize polychlorinated  
616 biphenyls by diverse microbial communities in soils with no significant exposure to PCB  
617 contamination. *Environ Microbiol*. 2007;9: 1890–1897. doi:10.1111/j.1462-2920.2007.01305.x
- 618 47. Adler B, de la Peña Moctezuma A. *Leptospira* and leptospirosis. *Vet Microbiol*. 2010;140: 287–  
619 296. doi:10.1016/j.vetmic.2009.03.012
- 620 48. Chakraborty A, Miyahara S, Villanueva SYAM, Gloriani NG, Yoshida S. In Vitro Sensitivity  
621 and Resistance of 46 *Leptospira* Strains Isolated from Rats in the Philippines to 14  
622 Antimicrobial Agents. *Antimicrob Agents Chemother*. 2010;54: 5403–5405.  
623 doi:10.1128/AAC.00973-10
- 624 49. Chakraborty A, Miyahara S, Villanueva SYAM, Saito M, Gloriani NG, Yoshida S. A novel  
625 combination of selective agents for isolation of *Leptospira* species. *Microbiol Immunol*.  
626 2011;55: 494–501. doi:10.1111/j.1348-0421.2011.00347.x
- 627 50. Wuthiekanun V, Amornchai P, Langla S, White NJ, Day NPJ, Limmathurotsakul D, et al.  
628 Antimicrobial Disk Susceptibility Testing of *Leptospira* spp. Using *Leptospira* Vanaporn  
629 Wuthiekanun (LVW) Agar. *Am J Trop Med Hyg*. 2015;93: 241–243. doi:10.4269/ajtmh.15-  
630 0180
- 631 51. Hammerschlag MR. Activity of trimethoprim-sulfamethoxazole against *Chlamydia trachomatis*  
632 in vitro. *Rev Infect Dis*. 1982;4: 500–505.
- 633 52. Fan H, Brunham RC, McClarty G. Acquisition and synthesis of folates by obligate intracellular  
634 bacteria of the genus *Chlamydia*. *J Clin Invest*. 1992;90: 1803–1811. doi:10.1172/JCI116055
- 635 53. Sandoz KM, Rockey DD. Antibiotic resistance in *Chlamydiae*. *Future Microbiol*. 2010;5: 1427–  
636 1442. doi:10.2217/fmb.10.96
- 637 54. Marti H, Borel N, Dean D, Leonard CA. Evaluating the Antibiotic Susceptibility of *Chlamydia* -  
638 New Approaches for in Vitro Assays. *Front Microbiol*. 2018;9: 1414.  
639 doi:10.3389/fmicb.2018.01414
- 640 55. Achari A, Somers DO, Champness JN, Bryant PK, Rosemond J, Stammers DK. Crystal  
641 structure of the anti-bacterial sulfonamide drug target dihydropteroate synthase. *Nat Struct Biol*.  
642 1997;4: 490–497. doi:10.1038/nsb0697-490
- 643 56. Enne VI, Bennett PM, Livermore DM, Hall LMC. Enhancement of host fitness by the *sul2*-  
644 coding plasmid p9123 in the absence of selective pressure. *J Antimicrob Chemother*. 2004;53:  
645 958–963. doi:10.1093/jac/dkh217
- 646 57. Baca AM, Sirawaraporn R, Turley S, Sirawaraporn W, Hol WG. Crystal structure of  
647 *Mycobacterium tuberculosis* 7,8-dihydropteroate synthase in complex with pterin  
648 monophosphate: new insight into the enzymatic mechanism and sulfa-drug action. *J Mol Biol*.  
649 2000;302: 1193–1212. doi:10.1006/jmbi.2000.4094



- 650 58. Andersson DI. The biological cost of mutational antibiotic resistance: any practical  
651 conclusions? *Curr Opin Microbiol.* 2006;9: 461–465. doi:10.1016/j.mib.2006.07.002
- 652 59. Petkowski JJ, Bains W, Seager S. Natural Products Containing a Nitrogen–Sulfur Bond. *J Nat*  
653 *Prod.* 2018;81: 423–446. doi:10.1021/acs.jnatprod.7b00921
- 654 60. Baunach M, Ding L, Willing K, Hertweck C. Bacterial Synthesis of Unusual Sulfonamide and  
655 Sulfone Antibiotics by Flavoenzyme-Mediated Sulfur Dioxide Capture. *Angew Chem Int Ed*  
656 *Engl.* 2015;54: 13279–13283. doi:10.1002/anie.201506541
- 657 61. Stokes HW, Gillings MR. Gene flow, mobile genetic elements and the recruitment of antibiotic  
658 resistance genes into Gram-negative pathogens. *FEMS Microbiol Rev.* 2011;35: 790–819.  
659 doi:10.1111/j.1574-6976.2011.00273.x
- 660 62. Franco DA, Webb J, Taylor CE. Antibiotic and sulfonamide residues in meat: Implications for  
661 human health. *J Food Prot.* 1990;53: 178–185.
- 662 63. Kumar K, Gupta SC, Chander Y, Singh AK. Antibiotic use in agriculture and its impact on the  
663 terrestrial environment. *Adv Agron.* 2005;87: 1–54.
- 664 64. van Belkum A, Soriaga LB, LaFave MC, Akella S, Veyrieras J-B, Barbu EM, et al.  
665 Phylogenetic Distribution of CRISPR-Cas Systems in Antibiotic-Resistant  
666 *Pseudomonas aeruginosa*. *mBio.* 2015;6. doi:10.1128/mBio.01796-15
- 667 65. Toleman MA, Bennett PM, Walsh TR. ISCR Elements: Novel Gene-Capturing Systems of the  
668 21st Century? *Microbiol Mol Biol Rev.* 2006;70: 296–316. doi:10.1128/MMBR.00048-05
- 669 66. Toleman MA, Walsh TR. Combinatorial events of insertion sequences and ICE in Gram-  
670 negative bacteria. *FEMS Microbiol Rev.* 2011;35: 912–935. doi:10.1111/j.1574-  
671 6976.2011.00294.x
- 672 67. D’Costa VM, King CE, Kalan L, Morar M, Sung WWL, Schwarz C, et al. Antibiotic resistance  
673 is ancient. *Nature.* 2011;477: 457. doi:10.1038/nature10388
- 674 68. Bhullar K, Waglechner N, Pawlowski A, Koteva K, Banks ED, Johnston MD, et al. Antibiotic  
675 resistance is prevalent in an isolated cave microbiome. *PloS One.* 2012;7: e34953.  
676 doi:10.1371/journal.pone.0034953
- 677 69. Perron GG, Whyte L, Turnbaugh PJ, Goordial J, Hanage WP, Dantas G, et al. Functional  
678 Characterization of Bacteria Isolated from Ancient Arctic Soil Exposes Diverse Resistance  
679 Mechanisms to Modern Antibiotics. *PLOS ONE.* 2015;10: e0069533.  
680 doi:10.1371/journal.pone.0069533
- 681 70. Crofts TS, Gasparrini AJ, Dantas G. Next-generation approaches to understand and combat the  
682 antibiotic resistome. *Nat Rev Microbiol.* 2017;15: 422–434. doi:10.1038/nrmicro.2017.28

683

684

685 **13 Figure legends**

686

687 **Figure 1** – (A) Segment of the multiple sequence alignment including any *sul* genes with at most 90%  
688 similarity to reported *sul* genes and a representative chromosomal *folP* gene for all bacterial phyla with  
689 complete genomes available in NCBI RefSeq. (B) IceLOGO highlighting the difference in amino acid  
690 frequency at each position of the region of the *folP* protein sequence containing the identified insertion  
691 between the multiple sequence alignment of *sul* gene products and the chromosomally-encoded FolP proteins.  
692 The upper part of the iceLOGO plot shows residues overrepresented in the *sul*-encoded FolP proteins; the  
693 bottom part shows residues overrepresented in chromosomally-encoded FolP proteins for all bacterial phyla  
694 with complete genomes available. Only differences with significant z-score under a confidence interval of 0.01  
695 are shown. (C) Schematic representation of the genetic environment of *sul2* genes, similar arrangements in  
696 chromosomally-encoded *folP* genes of the Gammaproteobacteria, Betaproteobacteria and Alphaproteobacteria,  
697 and arrangements in other major phyla. Arrow boxes indicate coding regions. When available, gene names or  
698 NOG identifiers are provided. Boxes for *folP* genes containing the two-amino acid insertion are designated as  
699 *folP*<sup>\*</sup>.

700

701 **Figure 2** – Consensus tree of Sul/FolP protein sequences. Branch support values are provided as Bayesian  
702 posterior probabilities. For clarity, only posterior probability values higher than 0.8 are displayed. Proposed  
703 lateral gene transfer and mobilization events are shown by means of superimposed continuous and dotted,  
704 respectively, arrows.

705

706 **Figure 3** – Consensus tree of N-terminal GlmM protein sequences. Branch support values are provided as  
707 Bayesian posterior probabilities. For clarity, only posterior probability values higher than 0.8 are displayed.  
708 The placement of *sul2*-encoded proteins is indicated by a shaded ellipse.

709

710 **Figure 4** – (A) %GC content of *folP* and all other chromosomal coding sequences in different clades. The  
711 %GC content of *sul1/2* and *sul3* genes is shown adjacent to that of the *Rhodobiaceae* and the *Leptospiraceae*.  
712 (B) Correlation between the %GC content of *folP* genes and that of all other coding sequences in their  
713 respective genomes. The data points corresponding to *folP*<sup>\*</sup> genes from the *Rhodobiaceae* and the  
714 *Leptospiraceae* are shown as squares.

715

716 **Figure 5** – Schematic diagram of the evolutionary process leading to the emergence of *sul1/2*- and *sul3*-  
717 harboring mobile genetic elements. (1) A set of mutagenic events in the *Leptospiraceae folP* gene generates  
718 the signature motif observed in *folP*<sup>\*</sup> and *sul* genes. (2) Following the diversification of the  
719 Alphaproteobacteria, the *Leptospiraceae folP*<sup>\*</sup> gene is transferred to the *Rhodobiaceae*. (3) Upon the clinical  
720 and agricultural introduction of sulfonamides, *folP*<sup>\*</sup> genes from the *Leptospiraceae* and the *Rhodobiaceae* are  
721 independently mobilized, giving rise to the *sul*-containing mobile elements reported in clinical isolates. This  
722 figure was constructed using some Servier Medical Art templates, which are licensed under a Creative  
723 Commons - Attribution Unported License.

724

725 **14 Supplementary material**

726

727 **Supplementary material 1** – List of accession numbers for chromosomal and plasmid sequences containing  
728 FolP/Sul/GlmM-encoding genes used in this work. The sequence accession number, the species name and the  
729 corresponding FolP, Sul and GlmM protein accessions are provided in different columns.

730

731 **Supplementary material 2** – List of oligonucleotides used in this work.

732

733 **Supplementary material 3** – Multiple sequence alignment including *sul* genes at most 99% similar to those  
734 reported in the literature and one representative chromosomal *folP* gene from bacterial phyla with complete  
735 genomes available in RefSeq.

736

737 **Supplementary material 4** – PROSITE-formatted pattern of the region containing the identified two-amino  
738 acid insertion in *sul*-encoded proteins used to seed the PHI-BLAST search.

739

740 **Supplementary material 5** – Detail of the multiple sequence alignment region containing the two-amino acid  
741 signature motif including Sul sequences and FolP sequences from members of the *Rhodobiaceae*, the  
742 *Leptospiraceae* and the Chlamydiae.

743

744 **Supplementary material 6** – List of accession numbers (Nucleotide and Protein) for the *sul1*, *sul2* and *sul3*  
745 genes used in the tBLASTX search of *folP* genetic surroundings.

746

747 **Supplementary material 7** – Unrooted Neighbor-Joining tree of Sul/FolP homologs. Branch support values  
748 are provided as the percent of bootstrap replicates in which the branching was observed. Support values are  
749 only shown for branches with at least 80% support. The cluster of Actinobacteria duplicated *folP* gene  
750 products that were removed from further analysis is indicated by the shaded ellipse.

751

752 **Supplementary material 8** – Multiple sequence alignment (FASTA format) of FolP/Sul sequences used for  
753 phylogenetic inference after trimming with GBLOCKS.

754

755 **Supplementary material 9** – Sequences of *folP* genes used in the *folP* sequence analysis (FASTA format).

756

757 **Supplementary material 10** – Values of overall and codon-position %GC content across all protein coding  
758 genes in a genome, and for *folP* genes, on genomes of all bacterial orders with complete genome assemblies,

759 of each bacterial family for the Proteobacteria and all available complete genomes for clades of interest  
760 (*Rhodobiaceae*, Spirochaetes and Chlamydiae).

761

762 **Supplementary material 11** – Synonymous and non-synonymous mutation patterns in pair-wise alignments  
763 between the N- and C-terminal regions of *Rhodobiaceae glmM* genes.

764

765 **Supplementary material 12** – Schematic representation of the genetic environment of *sul2* genes, similar  
766 arrangements in chromosomally-encoded *folP* genes of the Gammaproteobacteria, Betaproteobacteria and  
767 Alphaproteobacteria, and arrangements in other putative mobilization instances of the *folP* gene. Arrow boxes  
768 indicate coding regions. When available, gene names or NOG identifiers are provided. Boxes for *folP* genes  
769 containing the two-amino acid insertion are designated as *folP\**.

770

**A.** Acidobacterium capsulatum  
 Streptomyces coelicolor  
 Kiritimatiella glycovorans  
 Rhodopirellula baltica  
 Fimbrimonas ginsengisoli  
 Deinococcus radiodurans  
 Desulfurispirillum indicum  
 Escherichia coli  
 Caldisericum exile  
 Thermodesulfovibrio yellowstonii  
 Fusobacterium nucleatum  
 Bacillus subtilis  
 Dehalococcoides mccartyi  
 Dictyoglomus turgidum  
 Thermotoga maritima  
 Coprothermobacter proteolyticus  
 Thermaerovibrio acidimanovorans  
 Deferribacter desulfuricans  
 Elusimicrobium minutum  
 Calditrix abyssii  
 Thermodesulfovibrio geofontis  
 Treponema succinifaciens  
 Aquifex aeolicus  
 Nostoc punctiforme  
 Verrucomicrobium spinosum  
 Chlamydia trachomatis  
 Sul2 Ecoli  
 SUL2 (PMID: 3075438)  
 Sul2 Pmultocida  
 Sul2 Apleuropneumoniae  
 Sul1 Ecoleace  
 Sul1 Ecoli  
 SUL1 (PMID: 3054482)  
 Sul1 Uncultured  
 Sul3 Ecoli  
 SUL3 (PMID: 12604565)

AAMQAGVAA-ERVALDPGGYGF--KVLGNYLSLGAQ  
 AVLDGGIAP-DRVIVDPGLGF--SKDAEHDLVLLAHL  
 AAREAGIAP-TRIAVDPGIGF--GKTAEQNVTLRAL  
 ACLDLGIEP-ERICLDPGIGF--GKTHDHNLTLLRAL  
 QAEEAGVKR-EKIWLDPGIGF--GKTFEHNLLALLNL  
 EVKSAGVF--SVLLDPGIGF--GKTLDNHNSLLRAV  
 AFLEAGGSA-GRFLDPGIGL--PKDSQANRLIMSM  
 RCEQAGIAP-ERKLLDPGGF--GKNSHNSYLLRAL  
 FLNSVGIK---IVIDPGIGF--GKTRHNLELITAKL  
 IAKQAGVDE-NMIIDPGIGF--GKLEPHNLTITAKL  
 IADKYGIDR-DKIILDPGIGF--GKQVVEQNLVLSRL  
 IAVVAGVDE-KNIILDPGIGF--AKTYHDNLAVMKRL  
 RLLGLGVA-RNIIDPGVGF--GKLVVEQNLVLSRL  
 YAKENGVDP-EKIIVDPGIGF--GKRYEDNLEIMARL  
 IYKRGVNV---QIVLDPGIGF--GKRVEDNLEIMARR  
 YALSKGIKE-NQIILDPGIGF--AKLPEHNLEVLRR  
 IARGGVIR-TRIILDPGIGF--GKTYQHNLILRLQ  
 IALKCGVSK-NSIILDPGGF--GKTLDDNYLITLKY  
 ECKRGLHT-DNIILDPGGF--GKLNKQNFLLIKRL  
 RLERAGI---KIIIDPGIGF--GKRLDNLHLLRDL  
 FLVKGIIPF-ENIILDPGIGF--GKTFEHNLIQLKRL  
 FALKNGIEK-EKIIVDPGIGF--GKLNENLNLISNC  
 KLKELGFRREEKIILDPGIGF--GKLPVHNVEILKRF  
 AATTAGI-DLDKIIIDPGIGF--AKNYEQNLIEFRL  
 LAKTAGLSE-ERVLLDPGIDF--AKQRDDNLAIYREL  
 QFAQVGLDTSQVWVDPGIGF--GKTFVQSMILMDGV  
 ALTGAGIKR-NRLVLDPMGFFELGAAPEPSTLSVLARF  
 ALTGAGIKR-NRLVLDPMGFFELGAAPEPSTLSVLARF  
 ALTGAGIKR-NRLVLDPMGFFELGAAPEPSTLSVLARF  
 ALRRSGVAA-DRILDPGLGFFLSPAPEPSTLSVLSNL  
 ALRRSGVAA-DRILDPGMGFFLSPAPEPSTLSVLSNL  
 ALRRSGVAA-DRILDPGMGFFLSPAPEPSTLSVLSNL  
 ALRRSGVAA-DRILDPGMGFFLSPAPEPSTLSVLSNL  
 ALVAVGVR-ERIILDPGMGFFLSNFPSTLSVLKRF  
 ALVAVGVR-ERIILDPGMGFFLSNFPSTLSVLKRF

**B.**

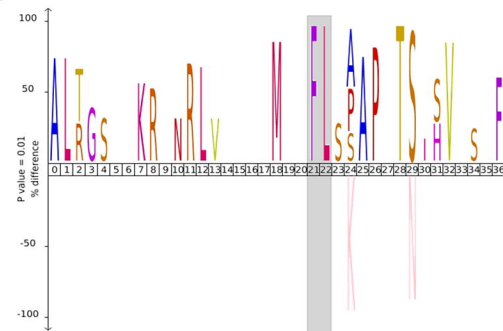

**C.**

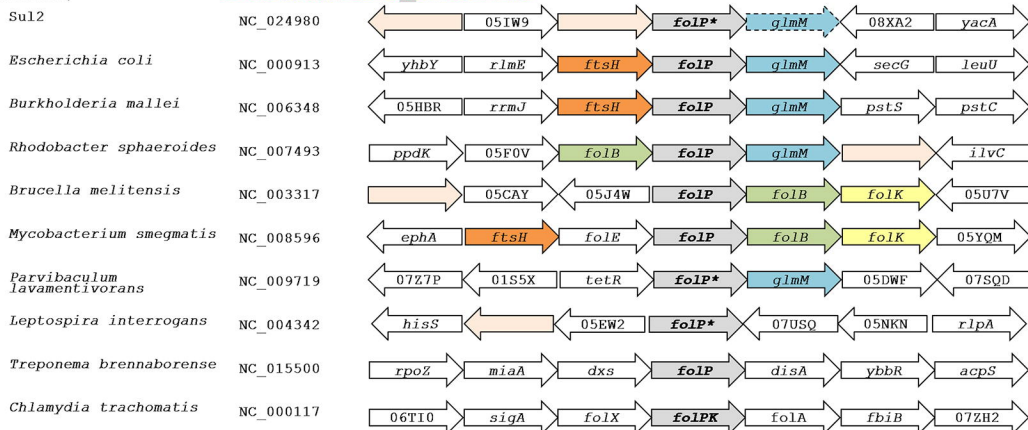

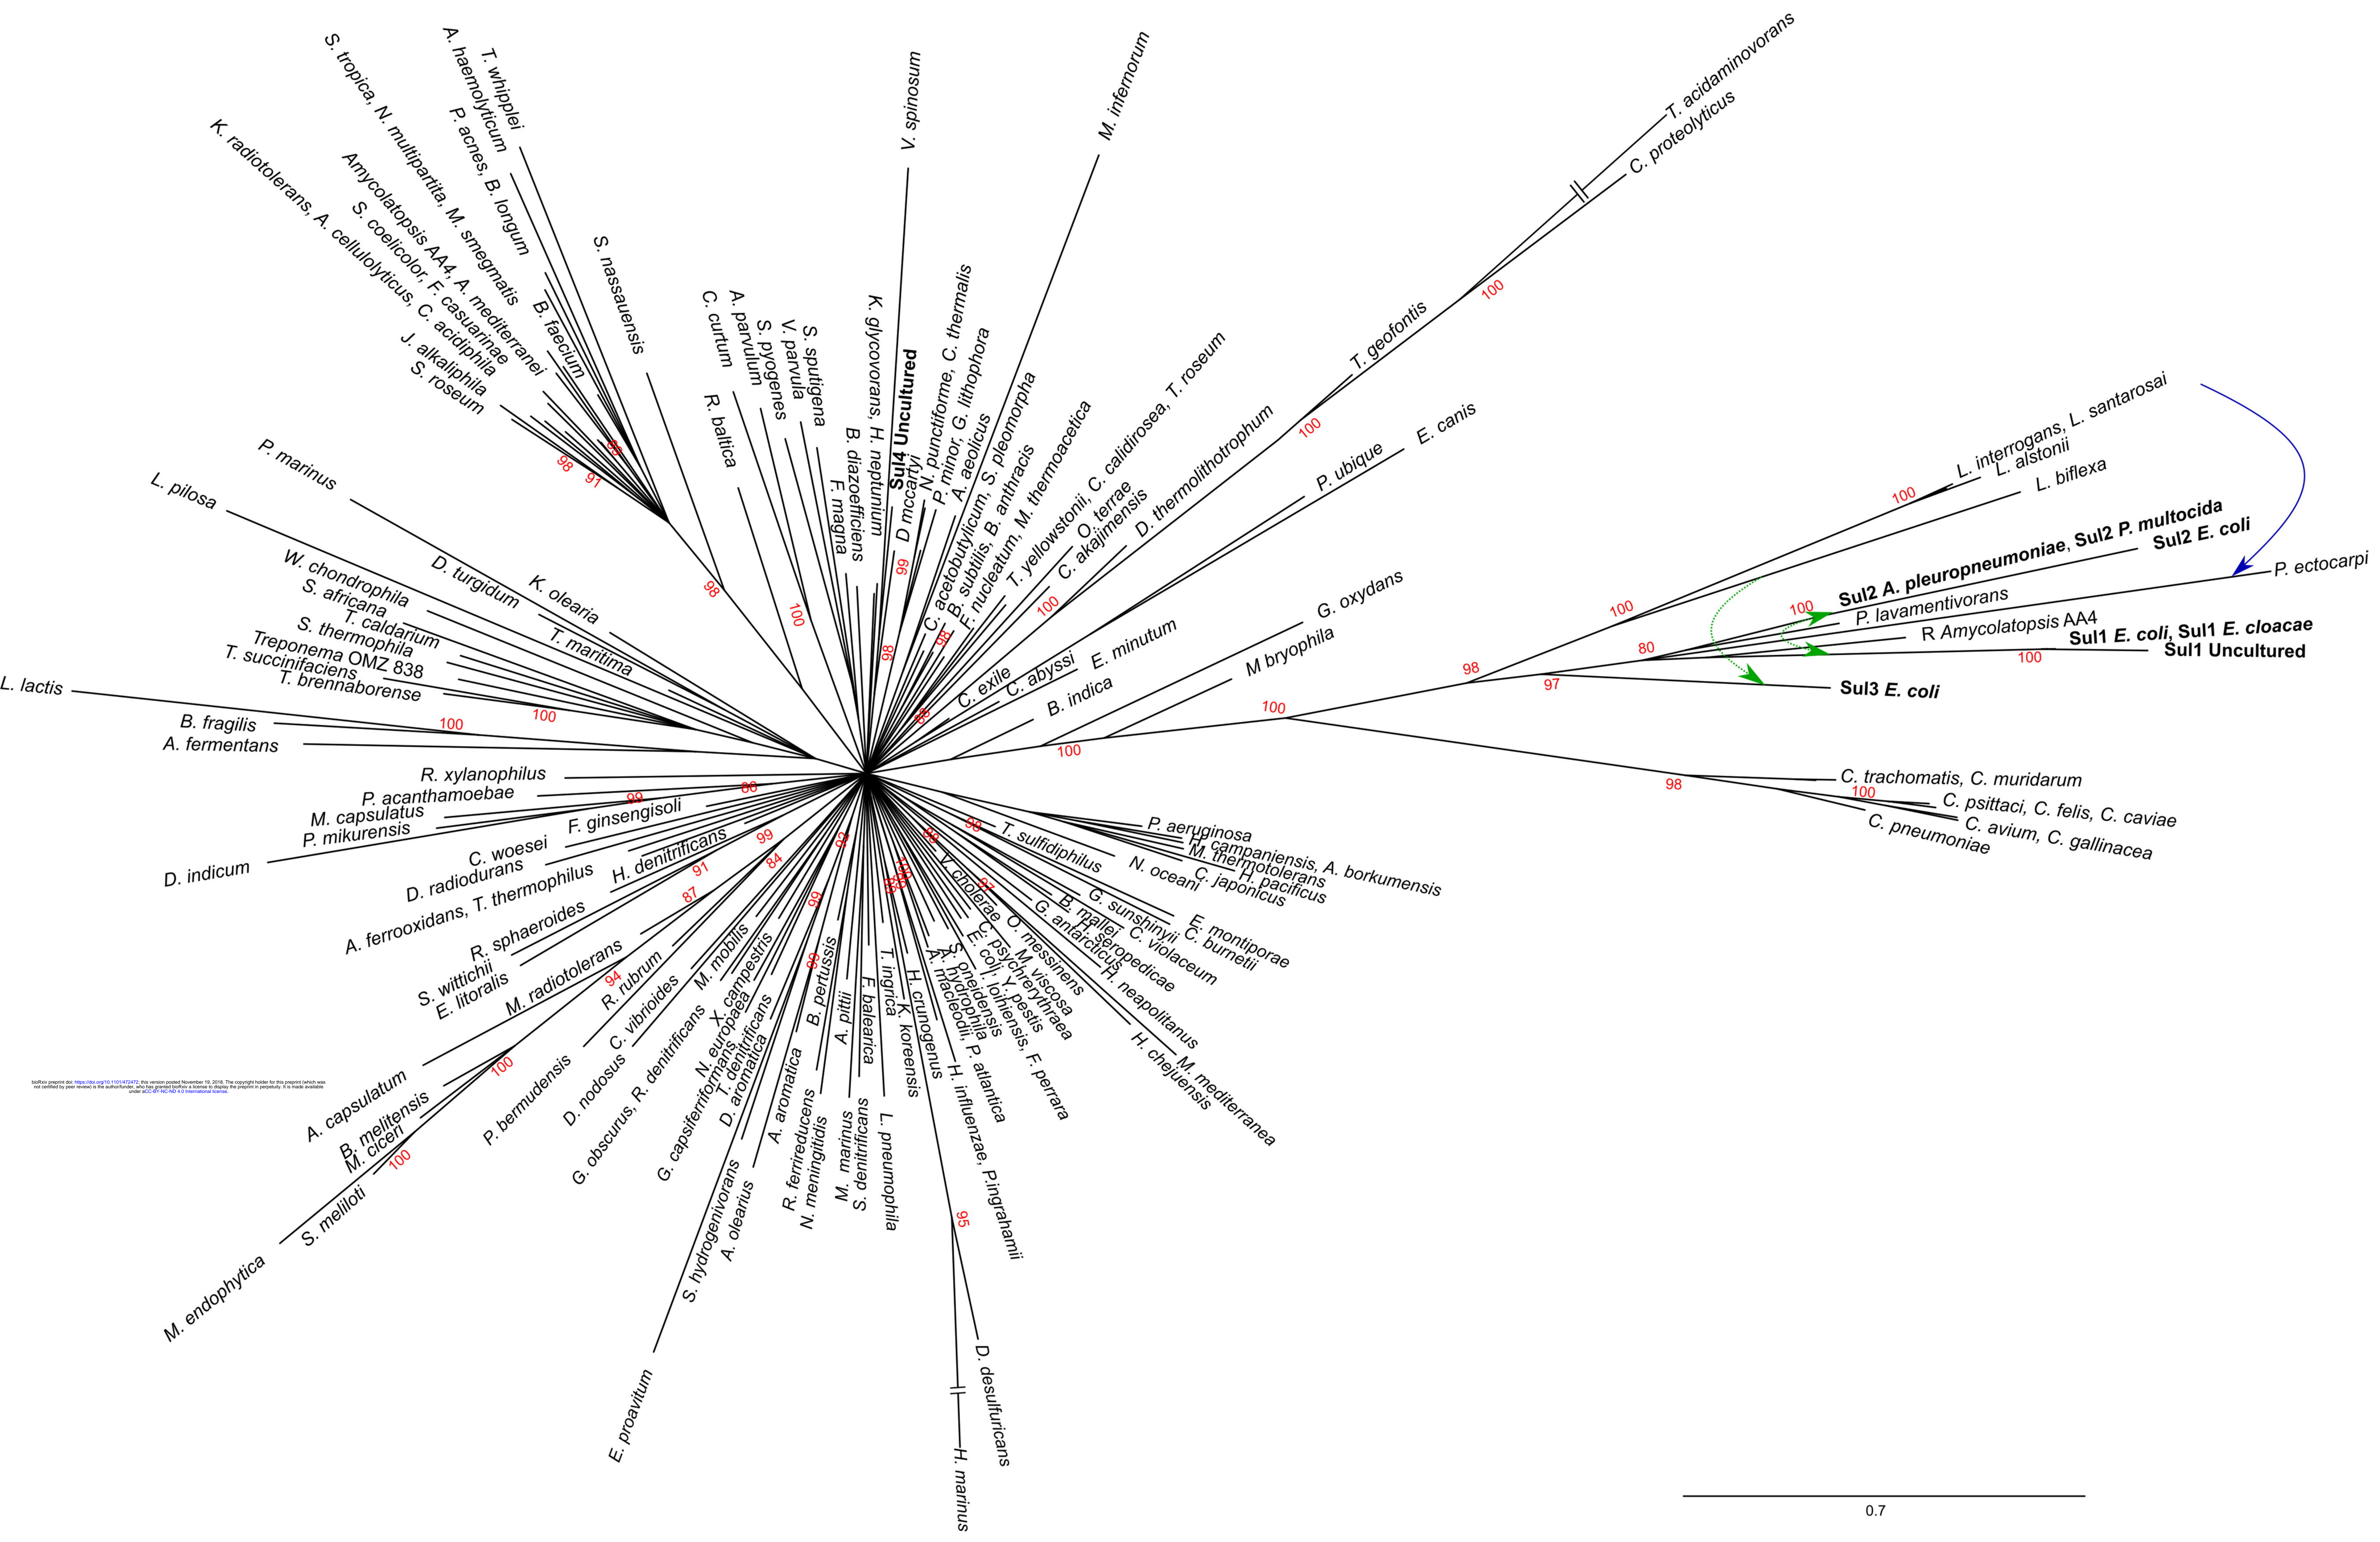

bioRxiv preprint doi: <https://doi.org/10.1101/124742>; this version posted November 15, 2016. The copyright holder for this preprint (which was not certified by peer review) is the author/funder, who has granted bioRxiv a license to display the preprint in perpetuity. It is made available under aCC-BY-NC-ND 4.0 International license.

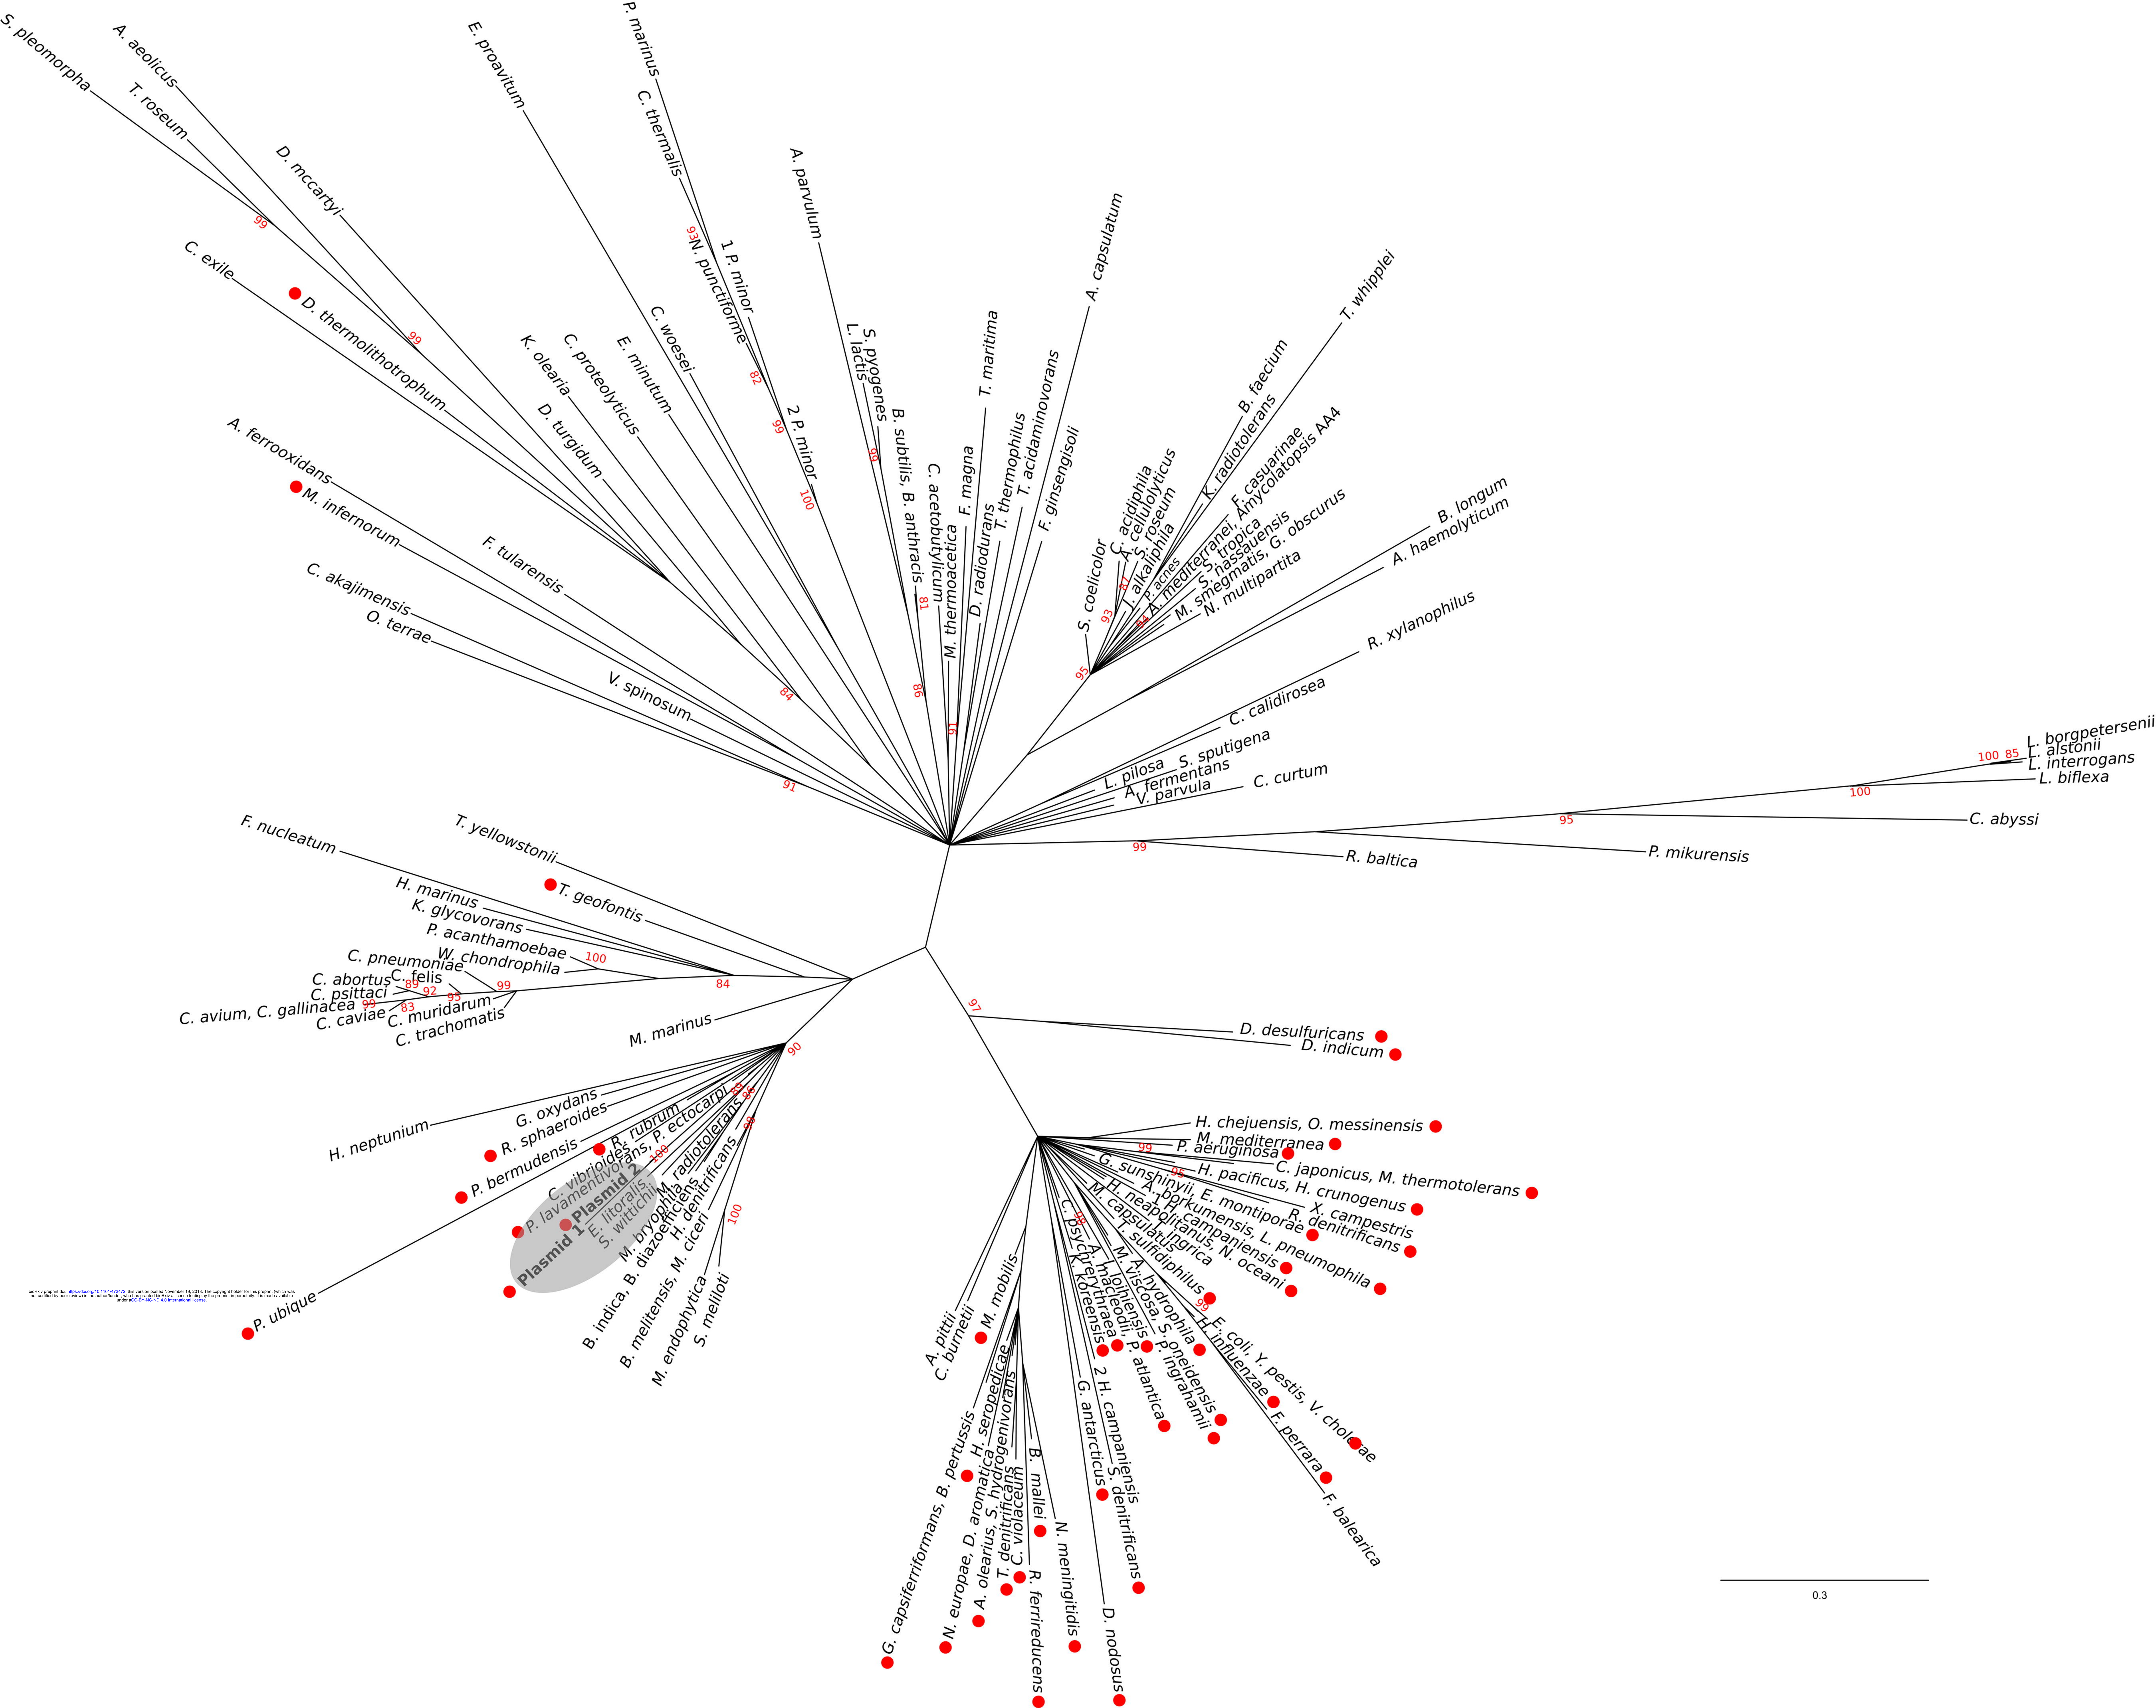

**A.**

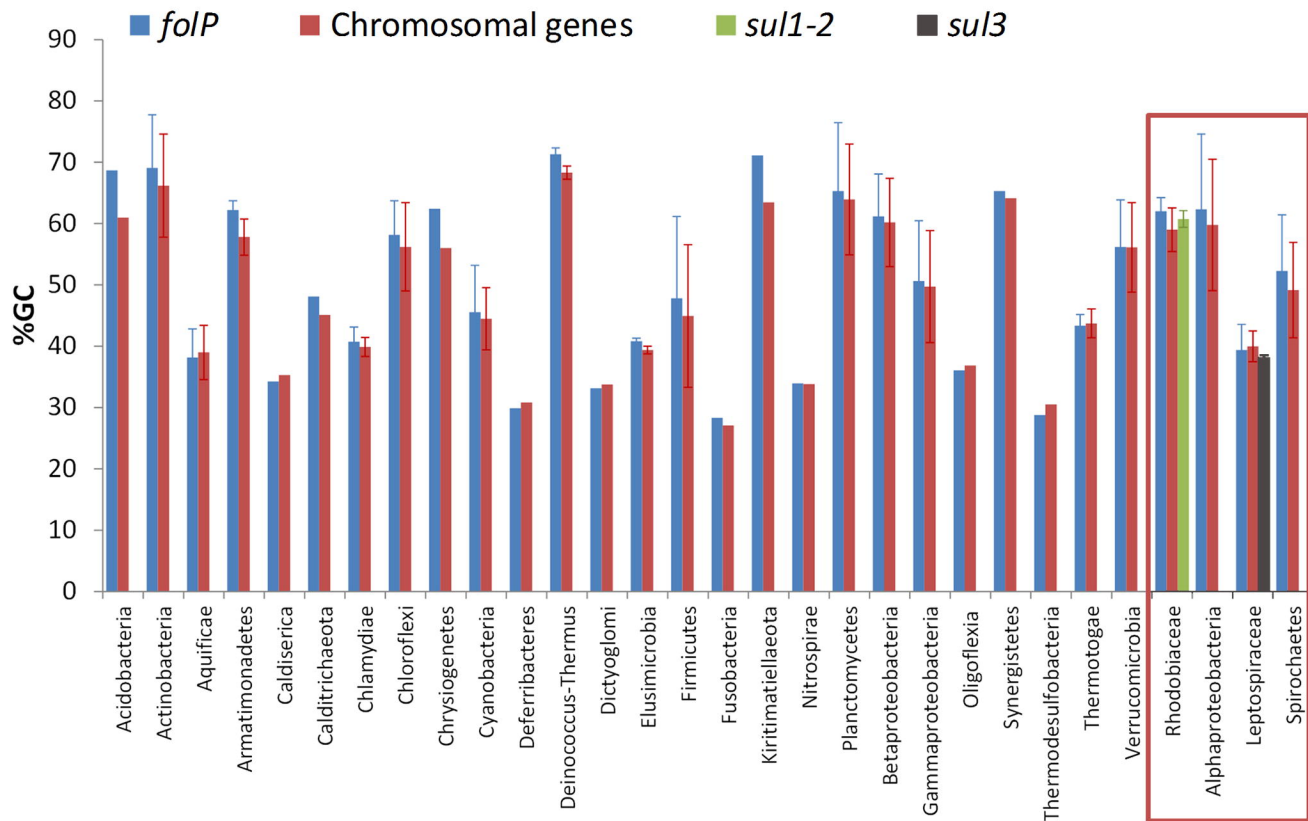

**B.**

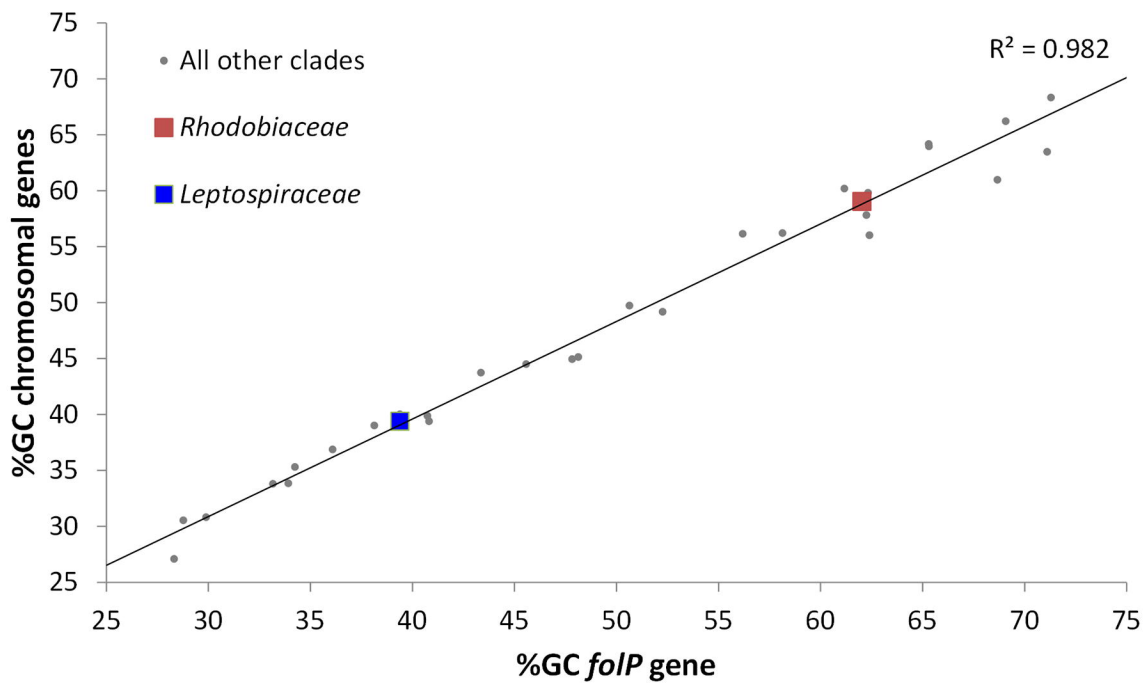



# 1. SIGNATURE MOTIF MUTATION

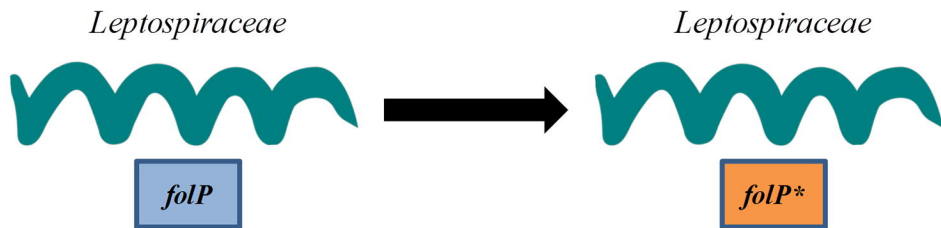

# 2. LATERAL GENE TRANSFER

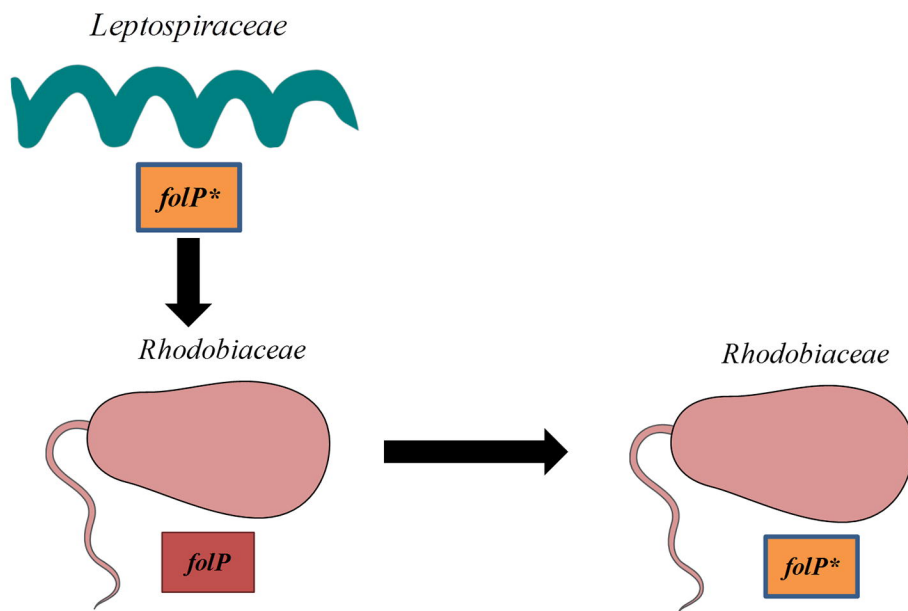

# 3. MOBILIZATION

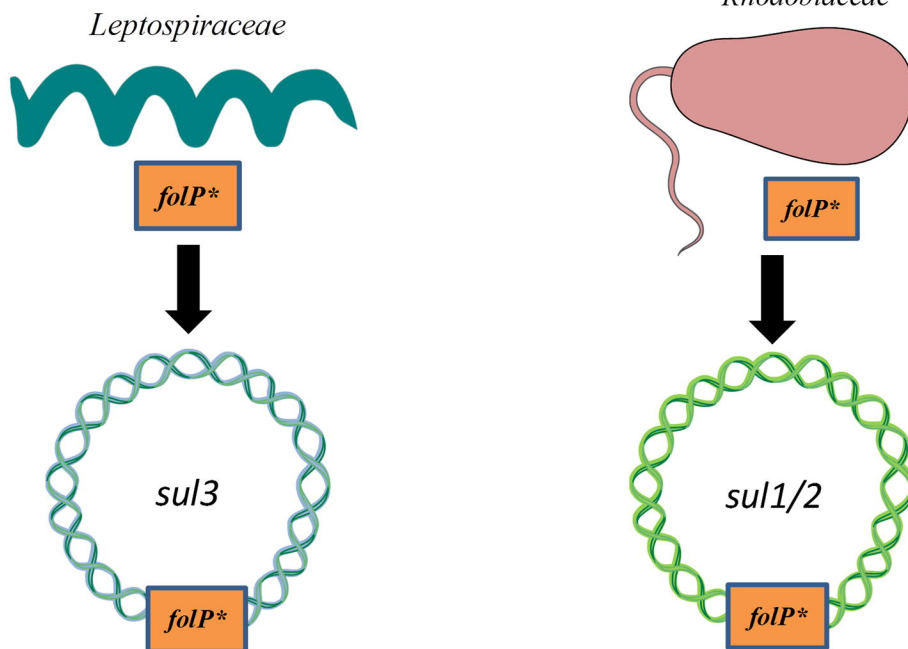

Alphaproteobacteria  
diversification

AMELIORATION

Sulfonamide  
introduction
